# Supplementary material for: An immune signature to predict the prognosis of ATRX-wildtype glioma patients and guide immune checkpoint blockade therapy
Source: Aging (Albany NY). 2023 Oct 6;15(19):10453–72. doi: 10.18632/aging.205088 (PMC10599764; doi:10.18632/aging.205088)
Supplement: Supplementary Table 1 [file aging-15-205088-s002.xlsx]

## Sheet: Sheet1
Supplementary Table 1. Stromal and immune scores of ATRX-wt and ATRX-mt glioma patients in TCGA.
ID	ESTIMATE stromal score	ESTIMATE immune score
TCGA-DU-6392	1297.61	1336.61
TCGA-DU-5870	733.32	581.753
TCGA-HT-7483	897.259	469.184
TCGA-S9-A7R1	-128.01	-381.99
TCGA-DU-7008	-342.368	-19.8147
TCGA-DU-7009	-163.884	-516.063
TCGA-E1-A7YY	239.653	132.67
TCGA-E1-A7Z4	10.0053	1405.64
TCGA-DU-A7T8	1139.19	1318.42
TCGA-S9-A6WE	226.494	104.748
TCGA-E1-5311	-44.1763	-359.797
TCGA-DU-6404	893.072	732.578
TCGA-E1-5322	491.278	1626.4
TCGA-S9-A6UB	-355.737	-546.656
TCGA-DB-5270	1054.5	971.413
TCGA-HT-7604	92.4089	352.723
TCGA-CS-4938	422.032	804.961
TCGA-DU-6408	252.136	1016.14
TCGA-HT-7482	821.635	1371.56
TCGA-DU-7011	1915.6	1882.34
TCGA-S9-A7R3	574.551	1164.63
TCGA-S9-A7R7	1705.8	2382.6
TCGA-S9-A6U8	650.219	1106.14
TCGA-S9-A6U9	1521.8	1883.88
TCGA-HT-7481	107.171	-148.219
TCGA-DU-A6S6	-142.103	-769.261
TCGA-DU-6407	416.477	505.674
TCGA-DU-7294	86.0419	-133.628
TCGA-R8-A6ML	-71.6133	-273.913
TCGA-E1-A7YH	235.181	869.552
TCGA-DB-5278	483.307	66.4331
TCGA-DU-7015	590.261	1864.31
TCGA-R8-A6MK	-121.254	276.689
TCGA-06-0178	1217.69	2071.68
TCGA-DU-6401	1296.74	1040.83
TCGA-S9-A6TU	1060.11	1442.62
TCGA-S9-A6WG	2342.07	2016.12
TCGA-S9-A6WI	294.721	-411.275
TCGA-DU-A7TA	784.583	1323.24
TCGA-DB-5273	1279.42	1715.38
TCGA-E1-5305	445.089	709.334
TCGA-DB-5281	807.77	382.491
TCGA-E1-5318	634.808	407.757
TCGA-DB-5274	1087.18	1216.98
TCGA-S9-A6WD	-266.397	-322.423
TCGA-HT-7480	8.41445	-176.719
TCGA-DU-6396	1430.27	2904.16
TCGA-E1-A7YO	120.18	-234.028
TCGA-E1-A7Z3	912.416	755.885
TCGA-DB-A4XG	-434.027	-939.931
TCGA-DB-5276	1382.28	1698.97
TCGA-06-0184	2217.53	3050.23
TCGA-HW-7491	8.5579	-119.85
TCGA-E1-5303	1116.21	2094.62
TCGA-DU-6399	969.475	1378.37
TCGA-TM-A7CF	-307.031	-217.375
TCGA-DH-5142	1010.85	2582.81
TCGA-HT-8013	943.97	2309.41
TCGA-DU-7007	1531.03	2088.04
TCGA-S9-A6TS	443.572	923.836
TCGA-DU-7300	621.716	582.612
TCGA-TQ-A7RV	117.02	115.412
TCGA-DU-7302	-309.886	-339.519
TCGA-CS-4944	701.135	1281.99
TCGA-R8-A73M	-342.936	-294
TCGA-TM-A84F	1168.11	2758.2
TCGA-E1-5307	-64.8346	616.417
TCGA-HT-7611	575.955	1274.5
TCGA-HW-7486	568.712	726.732
TCGA-HT-7610	139.917	-289.203
TCGA-TM-A7C3	482.352	638.199
TCGA-DH-A7UR	252.075	-146.426
TCGA-CS-5396	490.227	583.092
TCGA-FG-5964	598.097	1503.69
TCGA-DU-6393	-152.715	-407.073
TCGA-E1-A7YQ	1840.31	2809.68
TCGA-CS-6665	1786.5	2649.45
TCGA-DU-A7TB	334.619	67.1822
TCGA-W9-A837	-202.466	-436.78
TCGA-DB-5277	376.631	347.236
TCGA-HT-7858	923.189	1845.02
TCGA-15-1444	1522.5	2096.47
TCGA-E1-5302	675.879	1590.12
TCGA-CS-6668	-468.192	-457.177
TCGA-TM-A7C5	5.90792	-58.6474
TCGA-CS-6669	-173.396	-659.478
TCGA-DU-6395	525.714	757.407
TCGA-FG-A711	-288.809	343.234
TCGA-TM-A7C4	-205.299	-205.993
TCGA-CS-6667	737.176	742.102
TCGA-76-4932	658.279	1520.87
TCGA-DB-5275	209.068	347.153
TCGA-FG-5962	153.494	-26.5573
TCGA-06-0125	757.693	853.937
TCGA-CS-6666	1157.96	1091.05
TCGA-06-0744	970.795	1349.24
TCGA-CS-6670	128.662	-322.693
TCGA-WY-A85C	352.846	717.852
TCGA-DB-A4XC	316.798	1062.04
TCGA-DB-A4X9	-208.43	90.427
TCGA-DH-5143	452.703	976.95
TCGA-DU-6397	613.953	567.255
TCGA-HT-7609	405.475	1124.29
TCGA-VM-A8C8	343.006	714.873
TCGA-WY-A85B	618.572	1461.29
TCGA-HW-7490	819.241	1213.44
TCGA-HW-7487	-261.534	-308.879
TCGA-HT-7681	460.027	592.931
TCGA-DB-5279	399.9	393.452
TCGA-DU-A7TG	556.409	383.981
TCGA-TQ-A7RK	-19.1482	110.189
TCGA-WY-A858	1663.62	2276.4
TCGA-CS-4942	563.476	2076.29
TCGA-WY-A85A	-14.8515	629.212
TCGA-VM-A8C9	1607.73	2914.31
TCGA-IK-8125	327.934	220.129
TCGA-HT-7686	1081.96	2512.86
TCGA-HW-8321	735.731	859.592
TCGA-FG-6690	480.889	1174.8
TCGA-DH-A66B	726.344	2067.2
TCGA-DU-7306	767.12	1077.27
TCGA-HW-7489	230.712	198.419
TCGA-FG-6691	979.892	1869.01
TCGA-E1-5304	-617.878	-291.811
TCGA-S9-A6TW	844.344	624.147
TCGA-S9-A6TX	468.316	263.647
TCGA-TM-A84L	982.419	1360
TCGA-TM-A84G	-290.358	-565.903
TCGA-27-1834	1005.61	2487.63
TCGA-TQ-A7RJ	310.695	1059.54
TCGA-HT-7479	1120.01	1474.61
TCGA-CS-5393	521.741	1277.35
TCGA-HT-7470	463.571	402.447
TCGA-FG-7637	452.748	190.514
TCGA-HW-8320	521.965	817.317
TCGA-WY-A859	-158.183	-547.295
TCGA-DB-A4XD	255.64	132.226
TCGA-HW-8319	95.2078	276.762
TCGA-HT-7854	971.348	1901.01
TCGA-EZ-7264	-262.203	-568.633
TCGA-VM-A8CE	719.829	260.308
TCGA-HT-7856	262.926	-290.887
TCGA-S9-A6WH	-246.239	-164.591
TCGA-FG-A4MT	103.228	205.772
TCGA-HT-8018	1913.06	1707.01
TCGA-WY-A85D	116.684	924.943
TCGA-DB-A4XE	-31.298	274.545
TCGA-CS-6290	1131.88	2597.62
TCGA-DU-A7TC	-126.736	-12.9665
TCGA-HT-7874	210.755	-345.29
TCGA-VV-A829	490.414	696.94
TCGA-FG-5965	623.601	1171.63
TCGA-E1-A7YW	406.472	723.422
TCGA-S9-A6TZ	533.463	1008.59
TCGA-TQ-A7RM	-221.278	-400.911
TCGA-FG-A710	840.84	1700.15
TCGA-DB-5280	493.537	396.631
TCGA-CS-4943	460.284	819.135
TCGA-S9-A7IQ	-103.897	-815.753
TCGA-HT-7881	-98.4701	-575.488
TCGA-HW-7495	268.752	-397.302
TCGA-S9-A6TY	-589.995	-819.775
TCGA-S9-A6U6	103.448	306.994
TCGA-12-0619	1728.55	2673.78
TCGA-12-3652	244.635	1177.31
TCGA-TM-A7CA	-141.331	27.5505
TCGA-HT-8114	1415.77	1924.2
TCGA-DU-A5TY	1405.53	2732.08
TCGA-TQ-A7RU	98.6025	-242.054
TCGA-TQ-A7RN	61.9576	-218.731
TCGA-06-0129	404.559	2285.35
TCGA-DB-A4XF	567.828	985.106
TCGA-DU-A5TP	764.512	2588.42
TCGA-TM-A84O	407.972	702.057
TCGA-HT-8019	97.6438	-416.14
TCGA-R8-A6MO	431.135	633.318
TCGA-FG-8191	841.471	1105.29
TCGA-S9-A6U5	307.568	1410.32
TCGA-E1-A7YV	170.55	-98.6874
TCGA-E1-A7Z6	167.71	679.294
TCGA-DH-5141	616.426	647.385
TCGA-HT-7688	-78.4674	-268.833
TCGA-DU-A5TS	356.552	853.279
TCGA-HW-A5KJ	-101.483	96.5804
TCGA-DB-A4XH	40.4471	-413.467
TCGA-S9-A7R8	559.342	1179.67
TCGA-06-2570	1475.98	1979.6
TCGA-HT-7902	322.255	519.988
TCGA-DB-A64R	-265.154	-551.928
TCGA-TQ-A8XE	-51.8319	284.27
TCGA-26-1442	670.852	1029.98
TCGA-28-5213	2492.07	3735.56
TCGA-TQ-A7RO	-78.8771	141.961
TCGA-S9-A6WL	898.071	32.4799
TCGA-RY-A83X	80.8804	-323.808
TCGA-DB-A75O	674.702	1713.19
TCGA-DU-7018	47.6765	-421.293
TCGA-RY-A847	555.419	890.139
TCGA-06-2563	1207.33	1606.65
TCGA-TM-A84H	-225.81	130.979
TCGA-DH-A669	253.999	1099.79
TCGA-DB-A4XB	-142.756	378.591
TCGA-DB-A64P	701.589	534.872
TCGA-S9-A7R4	1555.81	1324.71
TCGA-TQ-A7RP	1184.26	939.393
TCGA-HT-7602	630.269	1041.55
TCGA-DU-A5TR	1416.79	3215.46
TCGA-S9-A6U2	405.721	618.971
TCGA-HT-8113	-82.2028	-493.232
TCGA-DB-A64V	1160.62	2078.35
TCGA-E1-A7YE	1647.23	2003.92
TCGA-16-1045	2549	3367.09
TCGA-14-0871	631.88	184.958
TCGA-HW-A5KL	411.429	736.242
TCGA-FG-A70Y	816.954	1231.05
TCGA-S9-A7QY	-51.8503	-119.427
TCGA-FG-8181	511.194	-22.2467
TCGA-HT-8563	2371.45	3758.85
TCGA-TM-A84I	-134.649	694.212
TCGA-RY-A840	-300.267	-129.947
TCGA-DH-A66D	649.093	1522.92
TCGA-DB-A64U	338.757	43.8783
TCGA-FN-7833	1300.78	2460.48
TCGA-DB-A64S	1331.3	1789.05
TCGA-HT-A5RA	1135.37	1464.58
TCGA-S9-A7QZ	-130.561	-656.404
TCGA-TQ-A7RW	783.732	1790.7
TCGA-S9-A7IX	1148.3	1760.17
TCGA-DU-A76L	2249.25	2065.7
TCGA-CS-6188	1044.68	1579.29
TCGA-S9-A6WN	1483.79	2291.52
TCGA-06-0743	978.748	1819.34
TCGA-DU-7019	1089.42	1110.41
TCGA-DU-A5TU	909.773	2042.62
TCGA-TQ-A7RQ	-316.396	-710.065
TCGA-HT-A4DV	477.94	532.433
TCGA-DU-7301	1184.69	1647.32
TCGA-TQ-A7RR	464.358	1041.25
TCGA-S9-A6U1	451.452	650.702
TCGA-DU-A6S2	86.6681	-338.032
TCGA-FG-5963	1598.29	2527.34
TCGA-DB-A64O	430.329	940.227
TCGA-19-1390	206.347	556.106
TCGA-TM-A84Q	655.675	1558.37
TCGA-06-0132	2673.82	3265.7
TCGA-32-2638	2079.39	2505.54
TCGA-DU-A5TW	-8.39578	181.224
TCGA-TM-A84B	312.862	236.193
TCGA-HW-8322	119.9	367.569
TCGA-TM-A84M	-247.055	-592.343
TCGA-DH-5144	-212.612	152.944
TCGA-DU-A5TT	564.252	926.163
TCGA-S9-A6U0	2042.89	2694.91
TCGA-HT-7477	396.835	631.201
TCGA-19-2629	1229.38	2200.49
TCGA-DB-A64L	-169.029	527.023
TCGA-TM-A84J	580.997	-159.437
TCGA-E1-A7YN	2159.29	3641.51
TCGA-TM-A84T	392.577	788.114
TCGA-DU-8161	1230.68	2486.87
TCGA-FG-A4MY	405.979	729.046
TCGA-HT-7873	426.291	438.732
TCGA-S9-A7IY	405.828	1380.19
TCGA-VM-A8CH	778.516	1381.91
TCGA-DU-7304	759.048	1250.25
TCGA-VW-A7QS	3.18978	-269.294
TCGA-DH-A7US	280.907	256.693
TCGA-HT-7603	-89.5	-312.938
TCGA-32-2634	894.654	821.63
TCGA-FG-7638	365.782	255.091
TCGA-FG-8189	-101.582	-808.323
TCGA-DU-6394	31.0255	349.236
TCGA-DU-A6S8	-141.453	-180.917
TCGA-FG-A6J3	1599.89	2646.26
TCGA-12-1597	1137.81	1341.87
TCGA-HT-7608	615.004	782.565
TCGA-DU-A6S3	-59.2306	-549.938
TCGA-FG-A60L	750.107	1750.75
TCGA-HT-A619	-194.98	-382.297
TCGA-DU-8164	-246.783	-557.93
TCGA-TQ-A7RF	24.5834	817.609
TCGA-27-1835	606.425	685.203
TCGA-DU-A76R	365.248	140.995
TCGA-E1-A7YM	161.696	607.839
TCGA-CS-5395	471.856	474.21
TCGA-DU-A6S7	500.767	958.287
TCGA-WY-A85E	-363.226	-119.836
TCGA-06-0882	1685.14	2686.37
TCGA-HW-A5KM	1344.06	3344.65
TCGA-DU-8163	885.757	1561.64
TCGA-S9-A7J3	140.721	517.366
TCGA-FG-7641	-361.225	-880.67
TCGA-S9-A89Z	1238.81	2169.26
TCGA-FG-A713	409.785	-342.579
TCGA-02-2486	1615.79	3460.24
TCGA-HT-A5R7	270.93	192.358
TCGA-FG-8187	382.563	472.144
TCGA-FG-7643	669.639	381.858
TCGA-S9-A7J0	-246.434	237.416
TCGA-VM-A8CF	771.711	2386.64
TCGA-S9-A7IZ	406.2	1045.48
TCGA-DH-5140	489.472	454.636
TCGA-DU-6405	-4.81665	1367.58
TCGA-32-4213	2592.76	3118.39
TCGA-S9-A6WM	663.942	1203.33
TCGA-TQ-A7RG	343.816	488.161
TCGA-06-0168	2087.32	2709.59
TCGA-RY-A845	-32.6404	238.372
TCGA-E1-A7YJ	664.372	2017.15
TCGA-32-5222	1385.7	2566.32
TCGA-HT-7855	207.521	610.984
TCGA-P5-A77W	-81.6895	-296.131
TCGA-DU-8165	1237.65	2047.68
TCGA-26-5136	1263.91	2503.97
TCGA-DU-7298	176.798	752.401
TCGA-DU-5871	268.329	1179.8
TCGA-DB-A4XA	743.823	967.383
TCGA-FG-6688	949.588	2061.53
TCGA-S9-A6TV	1495.98	2537.25
TCGA-S9-A89V	490.147	900.942
TCGA-FG-A4MX	162.048	546.684
TCGA-S9-A6WP	418.411	1131.57
TCGA-FG-A87N	-111.544	396.833
TCGA-DH-A7UV	442.304	888.383
TCGA-S9-A6WO	174.063	1209.21
TCGA-TM-A84R	178.15	-506.132
TCGA-S9-A7QX	299.617	1054.23
TCGA-DB-A64X	98.9561	408.428
TCGA-FG-6692	698.399	1649.11
TCGA-FG-A4MW	701.092	781.992
TCGA-27-2519	1413.31	2927.74
TCGA-08-0386	731.07	701.929
TCGA-DU-5847	813.779	2410.52
TCGA-DU-A7T6	717.369	53.4659
TCGA-28-5208	1280.79	1812.49
TCGA-FG-7636	7.63858	584.569
TCGA-DB-A75M	498.672	973.558
TCGA-14-1823	1453.49	3032.77
TCGA-FG-A60K	-37.4837	305.099
TCGA-CS-6186	34.9921	866.848
TCGA-06-2561	1245.33	2494.92
TCGA-HT-A61C	940.695	1489.4
TCGA-76-4927	2074.91	2108.75
TCGA-HT-7693	692.489	1614.7
TCGA-HT-A61B	946.308	2650.34
TCGA-14-2554	1237.14	2443.46
TCGA-DU-5872	1020.48	1558.81
TCGA-DH-A7UT	483.129	1081.23
TCGA-DU-5851	438.923	508.338
TCGA-HT-7475	-391.349	-257.888
TCGA-HT-7606	152.825	350.004
TCGA-DH-A66F	-8.1318	28.998
TCGA-DU-A76O	600.282	1865.1
TCGA-DU-8166	234.58	695.394
TCGA-HT-A615	384.71	1547.36
TCGA-HT-A618	982.961	2463.7
TCGA-DU-6406	512.371	1454.42
TCGA-27-2521	711.474	501.654
TCGA-QH-A6X8	53.6593	319.991
TCGA-QH-A6XC	392.469	926.26
TCGA-06-2565	858.893	1400.38
TCGA-27-1831	1542.64	2692.72
TCGA-HT-7473	957.482	2469.51
TCGA-QH-A6XA	329.58	614.42
TCGA-FG-A6J1	498.063	925.313
TCGA-QH-A6X5	149.717	208.242
TCGA-HT-8011	239.393	619.756
TCGA-HT-7677	332.253	-20.7197
TCGA-TM-A84C	844.928	1712.48
TCGA-DB-A75P	783.447	1097.27
TCGA-E1-A7YL	1233.01	2202.78
TCGA-HT-A617	1302.94	2089.94
TCGA-27-2523	328.818	1023.27
TCGA-FG-8186	395.318	1440.14
TCGA-VV-A86M	275.169	1213.01
TCGA-TQ-A7RH	666.542	1308.49
TCGA-14-1034	1359.09	2593.52
TCGA-32-2615	1612.91	2222.43
TCGA-QH-A65X	905.964	962.028
TCGA-27-2528	1497.14	711.658
TCGA-HT-8564	718.709	932.941
TCGA-DU-8167	1207.28	1544.62
TCGA-02-2485	796.952	1115.7
TCGA-32-1970	710.905	1319.43
TCGA-FG-7634	1645.41	1481.08
TCGA-HT-A74K	1216.98	982.065
TCGA-02-2483	1448.18	1816.81
TCGA-E1-A7YS	-615.646	-524.359
TCGA-QH-A65R	134.397	-17.6341
TCGA-DU-5874	-36.7188	-318.533
TCGA-41-5651	541.865	330.778
TCGA-S9-A7QW	-474.864	-303.731
TCGA-FG-A6IZ	-26.1057	506.088
TCGA-DU-7010	623.71	661.152
TCGA-19-5960	-264.348	203.178
TCGA-FG-8188	653.982	797.944
TCGA-HT-7689	352.431	793.424
TCGA-12-5295	1045.73	2738.58
TCGA-28-5204	888.862	1778.34
TCGA-TM-A84S	204.399	636.641
TCGA-FG-6689	400.635	1146.34
TCGA-26-5133	845.967	614.278
TCGA-QH-A6CU	455.488	1220.03
TCGA-FG-A60J	499.343	834.072
TCGA-02-0047	1731.48	2092.53
TCGA-12-0616	665.436	1852.7
TCGA-DU-8162	578.332	343.839
TCGA-DU-5849	306.358	289.448
TCGA-12-3653	615.82	2131.52
TCGA-28-5209	1015.43	1188.05
TCGA-QH-A6CV	641.641	1845.84
TCGA-QH-A6X4	-287.829	-2.95436
TCGA-HT-7695	89.4701	-354.544
TCGA-KT-A74X	-13.4229	373.322
TCGA-KT-A7W1	191.235	826.34
TCGA-DB-A64W	-547.555	-1122.4
TCGA-E1-A7YD	-2.64348	810.21
TCGA-HT-7620	239.338	649.309
TCGA-FG-8185	118.184	372.07
TCGA-06-0686	1159.71	1451.67
TCGA-DU-8168	-448.201	-361.395
TCGA-S9-A6WQ	660.657	1510.21
TCGA-27-1837	1107.84	1891.65
TCGA-QH-A65Z	-173.724	-71.1712
TCGA-15-0742	274.458	929.848
TCGA-14-0790	446.531	773.551
TCGA-HT-8110	949.313	2791.28
TCGA-HT-8558	154.274	-568.456
TCGA-DH-A7UU	212.349	565.894
TCGA-FG-8182	571.067	1006.6
TCGA-28-5216	1428.71	1684.24
TCGA-06-1804	700.367	1407.34
TCGA-QH-A6CW	592.099	1248.56
TCGA-P5-A733	109.442	285.067
TCGA-VM-A8CA	1055.94	1149.53
TCGA-QH-A6CY	38.471	-97.4265
TCGA-DU-5853	874.403	1660.48
TCGA-41-2572	1428.56	1946.07
TCGA-06-0238	1285.55	2238.7
TCGA-WH-A86K	444.593	912.577
TCGA-P5-A72X	1059.47	838.998
TCGA-E1-A7Z2	-79.6157	-2.82536
TCGA-12-0618	369.552	437.42
TCGA-QH-A870	-248.85	346.957
TCGA-28-5220	440.069	1904.31
TCGA-HW-A5KK	1107.58	2392.24
TCGA-06-0644	2741.54	2714.84
TCGA-QH-A65V	221.97	489.313
TCGA-06-2562	1692.6	1981.13
TCGA-06-2558	1464.61	1542.58
TCGA-E1-A7YK	1424.08	2595.55
TCGA-HT-8104	894.102	1058.8
TCGA-QH-A6CX	891.36	1697.96
TCGA-P5-A737	-52.5841	186.72
TCGA-DB-A75K	954.024	1176.18
TCGA-41-3915	2330.61	2572.33
TCGA-06-0211	897.402	1333.83
TCGA-06-5408	884.705	1415.34
TCGA-DU-6403	396.551	1599.28
TCGA-P5-A72Z	-201.533	-529.255
TCGA-HT-7469	204.148	562.833
TCGA-DU-7006	1124.05	2427.77
TCGA-DU-A76K	107.177	-281.064
TCGA-28-5207	1434.45	1607.7
TCGA-HT-7884	156.132	-224.322
TCGA-14-0789	1976.92	2977.32
TCGA-DB-A75L	530.772	558.503
TCGA-QH-A86X	-29.0059	50.2388
TCGA-HT-A74L	285.751	310.145
TCGA-28-5215	2183.34	2102.46
TCGA-12-3650	680.631	1524.42
TCGA-P5-A730	599.617	241.539
TCGA-06-0158	1336.86	2129.39
TCGA-FG-A70Z	1499.72	1682.66
TCGA-FG-A4MU	1518.71	2168.59
TCGA-12-0821	741.543	995.259
TCGA-HT-A74J	269.137	601.572
TCGA-P5-A72W	46.8839	801.468
TCGA-S9-A7R2	871.329	2240.32
TCGA-DU-7290	1026.51	2448.84
TCGA-QH-A6X3	207.734	698.415
TCGA-RY-A83Z	-251.84	915.273
TCGA-27-1832	1659.62	2978.7
TCGA-19-2619	1006.79	777.743
TCGA-P5-A735	-110.2	359.746
TCGA-P5-A5F0	-464.16	-676.631
TCGA-26-5132	990.363	1668.72
TCGA-HT-8012	182.076	188.321
TCGA-76-4931	325.068	862.02
TCGA-QH-A6CZ	-273.236	-523.086
TCGA-P5-A731	1045.95	829.309
TCGA-06-5414	1268.51	2520.51
TCGA-26-5135	1912.71	1919.67
TCGA-32-2632	1538.99	3118.2
TCGA-DU-7013	323.676	1320.68
TCGA-06-5413	2186.05	2425.23
TCGA-06-5415	808.811	1142.49
TCGA-DU-5854	1674.43	1950.45
TCGA-06-5411	1408.26	1543.88
TCGA-S9-A7J1	364.327	383.832
TCGA-VW-A8FI	354.489	1592.56
TCGA-P5-A5EX	1611.71	2654.43
TCGA-DU-7292	363.958	261.985
TCGA-DU-6410	-326.552	-990.974
TCGA-P5-A5F2	-52.471	-66.2741
TCGA-S9-A7IS	412.248	629.76
TCGA-VM-A8CD	792.953	1886.8
TCGA-06-0745	1581.39	2061.75
TCGA-CS-4941	706.871	2283.23
TCGA-14-1825	332.504	767.707
TCGA-27-2524	1769.69	2358.83
TCGA-P5-A5F4	133.207	-233.627
TCGA-P5-A736	1183.68	2321.75
TCGA-DU-A7TD	1177.88	2312.37
TCGA-06-0210	1445.67	2569.34
TCGA-28-2513	2566.75	3161.92
TCGA-14-1829	1837.06	2540.05
TCGA-06-0878	1684.46	2361.4
TCGA-DU-6402	1302.15	2291.56
TCGA-HT-7694	-63.2174	-502.051
TCGA-DU-5855	666.865	1536.28
TCGA-DU-5852	1437.56	1781.33
TCGA-P5-A5EW	399.202	840.879
TCGA-HT-7468	168.103	299.926
TCGA-DU-7012	2016.71	3187.24
TCGA-HT-7476	1303.24	722.612
TCGA-CS-5397	848.004	1264.6
TCGA-HT-7478	1527.13	2590.05
TCGA-HT-8105	226.291	226.573
TCGA-06-5858	1463.11	1933.68
TCGA-HT-7684	894.741	1478.81
TCGA-DB-A64Q	-264.182	-118.699
TCGA-06-2564	1226.98	1966.44
TCGA-P5-A5F1	642.539	1444.91
TCGA-S9-A6UA	2127.33	3003.24
TCGA-06-0645	2806.43	3524.64
TCGA-06-0646	1412.96	2502.08
TCGA-FG-A87Q	1403.23	2365.59
TCGA-HT-8109	244.873	230.552
TCGA-RY-A83Y	166.885	852.586
TCGA-14-0817	1964.13	3176.64
TCGA-HT-A5RC	673.162	1397.53
TCGA-HT-7880	444.585	189.482
TCGA-28-2514	996.853	1126.66
TCGA-28-5218	3155.51	3251.51
TCGA-06-5417	258.528	510.071
TCGA-DU-8158	1194.95	2248.67
TCGA-27-1830	1945.59	2243.12
TCGA-HT-7601	1737.81	2701.7
TCGA-06-2559	1143.69	1400.88
TCGA-19-2620	1374.36	1470.6
TCGA-76-4925	556.722	837.139
TCGA-28-2509	768.168	1860.01
TCGA-32-1982	2157.69	2756.07
TCGA-06-5859	799.93	2185.03
TCGA-HT-7605	276.648	20.1495
TCGA-06-5412	2733.33	3346.17
TCGA-76-4926	391.593	1252.83
TCGA-P5-A781	233.591	175.39
TCGA-06-2567	1549.74	2435.35
TCGA-HT-7485	161.436	859.384
TCGA-16-0846	1027.12	2526.21
TCGA-HT-7474	285.121	150.339
TCGA-HT-7882	3945	3681.79
TCGA-HT-7879	789.692	831.41
TCGA-76-4929	810.711	1412.27
TCGA-E1-A7YI	147.12	470.616
TCGA-06-5410	3236.49	4285.21
TCGA-P5-A77X	-421.528	-441.952
TCGA-12-5299	1206.29	1977.78
TCGA-06-0174	891.031	854.462
TCGA-06-0157	1478.51	1989.39
TCGA-HT-7607	437.347	389.566
TCGA-28-2499	498.343	1797.4
TCGA-76-4928	1451.33	2201.34
TCGA-HT-7692	-54.3314	235.868
TCGA-27-2526	651.796	2397.87
TCGA-DU-7309	747.669	426.166
TCGA-06-5418	1135.57	2180.95
TCGA-06-0749	981.362	2495.87
TCGA-06-0747	295.327	973.113
TCGA-HT-A614	251.574	685.742
TCGA-28-1747	850.313	2574.15
TCGA-QH-A65S	400.2	1063.49
TCGA-02-0055	3537.92	3210.6
TCGA-HT-8108	395.86	1651.92
TCGA-HT-A74H	1066.06	1684.91
TCGA-DU-6542	907.932	1494.34
TCGA-P5-A5EY	410.293	1030.47
TCGA-P5-A780	983.933	1022.88
TCGA-P5-A5EZ	867.783	1472.54
TCGA-14-0787	793.257	1999.73
TCGA-06-0649	1893.59	2719.94
TCGA-RY-A843	198.021	419.059
TCGA-S9-A7J2	17.8258	-280.382
TCGA-TQ-A7RI	139.763	296.407
TCGA-QH-A6X9	-166.736	117.337
TCGA-HT-A616	138.42	-29.5861
TCGA-HT-8010	506.615	486.499
TCGA-26-5139	1257.28	1818.94
TCGA-P5-A5F6	525.972	957.395
TCGA-28-1753	2509.61	2893.99
TCGA-DU-6400	-301.664	25.3264
TCGA-32-1980	2336.03	2706.4
TCGA-06-2557	1822.7	3250.81
TCGA-14-0781	2339.39	2518.75
TCGA-06-0750	2199.26	2533.09
TCGA-HT-7680	749.071	1913.28
TCGA-06-0219	1110.75	2102.38
TCGA-DU-A7TJ	519.836	1429.62
TCGA-HT-7860	742.562	1934.67
TCGA-HT-8107	469.907	-234.075
TCGA-06-2569	1450.16	177.579
TCGA-HT-7875	-16.5127	-480.052
TCGA-CS-5394	-169.753	-301.663
TCGA-HT-7857	3004.77	3710.55
TCGA-HT-A4DS	399.191	2435.57
TCGA-P5-A72U	1999.88	2220.08
TCGA-HT-7616	1470.03	2183.43
TCGA-HT-8111	669.268	1484.96
TCGA-P5-A5EV	199.526	878.408
TCGA-F6-A8O3	-478.551	-453.855
TCGA-41-4097	2268.46	2339.06
TCGA-F6-A8O4	-242.563	-255.045
TCGA-19-2624	210.751	198.667
TCGA-HT-7676	624.396	1603.31
TCGA-HT-7471	879.809	1423.05
TCGA-HT-A5R5	828.02	1658.44
TCGA-HT-7877	199.991	-257.382
TCGA-HT-A74O	1187.64	2450.47
TCGA-HT-7690	1429.27	1905.95
TCGA-HT-7687	436.141	472.357
TCGA-HT-8106	2555.5	4314.65
TCGA-VM-A8CB	-497.787	-303.38
TCGA-HT-8015	869.741	1073.37
TCGA-HT-7691	1303.85	1856.88
TCGA-HT-7467	478.738	112.183
TCGA-HT-A5RB	110.706	-275.095
TCGA-HT-A5R9	204.904	-85.4154
TCGA-HT-7472	842.808	1532.85
