# Supplementary material for: An immune signature to predict the prognosis of ATRX-wildtype glioma patients and guide immune checkpoint blockade therapy
Source: Aging (Albany NY). 2023 Oct 6;15(19):10453–72. doi: 10.18632/aging.205088 (PMC10599764; doi:10.18632/aging.205088)
Supplement: Supplementary Table 2 [file aging-15-205088-s003.xlsx]

## Sheet: Sheet1
Supplementary Table 2. Overlapping genes between the low-stromal-score and low-immune-score groups of ATRX-wt glioma tissues.
Down-gene	Up-gene
SYT10	PLA2G2A
TMC3	SAA1
LOC730811	IDO1
ZNF99	SAA2
DGKK	FAM183A
MYOD1	C19orf59
HTR3B	C6orf15
PROKR2	LOC400696
PAR4	IL2RA
KIF12	TREML3
MCHR2	ICOS
KRT31	VSTM1
EIF4E1B	GALNT5
LHX5	SLAMF1
HTR1A	IBSP
G6PC2	CD3D
FAM153B	CD70
OR4N4	HOTAIR
TLX1NB	HOXC9
GPR6	CLEC12A
MSX2P1	TNFSF14
XKR7	HOXC11
NDST4	CCL20
KIAA1486	HOXC13
GLP1R	KLRB1
	HOXC10
	GPR141
	CD3G
	PI3
	HOXC8
	CASP5
	CXCR3
	TREML2
	UBASH3A
	HIST1H2BH
	HOXD11
	LOC284276
	C9orf44
	CD40LG
	GZMK
	TREM1
	DMBX1
	AREG
	HOXA4
	EMR1
	HOXA2
	SIT1
	PYHIN1
	HOXB8
	CATSPER1
	HOXC6
	SIRPG
	APCDD1L
	HOXA6
	HPD
	CD80
	HOXB4
	NKX2-5
	GPR18
	ELF5
	KRT75
	HOXA5
	MMP1
	MYBPH
	OTP
	PAX3
	HOXA3
	HOXD13
	CCR2
	C15orf48
	HMGA2
	LOC647946
	C1orf158
	CSTA
	LILRA5
	FPR2
	CXCR6
	GZMA
	TMEM150B
	C10orf81
	SERPINB2
	MMP7
	CST6
	C1orf87
	HOXB5
	CEACAM4
	HTRA4
	CPA6
	HOXA1
	LOC100216001
	HOXB9
	LRRC15
	C11orf88
	SLAMF9
	HOXA7
	C4orf6
	TCTEX1D4
	LTF
	DEFA1B
	PTPN22
	CHRNA9
	SKAP1
	TNFSF12
	LIMS3
	PLEK2
	GZMH
	LY9
	ADAMDEC1
	LOC400804
	TRPM8
	ZNF683
	HOXB3
	VGLL2
	FBXO39
	CLEC5A
	WT1
	IL10
	KRT80
	CD2
	HLA-DQB2
	EOMES
	SERPINA5
	CD1C
	HOXC5
	SPAG17
	HOXA9
	POSTN
	MAP1LC3C
	OR51E1
	CXCL10
	HOXB13
	GATA4
	KLHDC7A
	GPR1
	HOXB6
	ITK
	HOXD10
