# Supplementary material for: An immune signature to predict the prognosis of ATRX-wildtype glioma patients and guide immune checkpoint blockade therapy
Source: Aging (Albany NY). 2023 Oct 6;15(19):10453–72. doi: 10.18632/aging.205088 (PMC10599764; doi:10.18632/aging.205088)
Supplement: Supplementary Table 3 [file aging-15-205088-s004.xlsx]

## Sheet: Sheet1
Supplementary Table 3. Drug scores of 198 drugs in each sample.
ID	TCGA-DU-A5TR	TCGA-DB-A75P	TCGA-HT-8018	TCGA-DB-A75O	TCGA-E1-A7Z3	TCGA-32-1980	TCGA-FG-5963	TCGA-VM-A8C9	TCGA-HT-8106	TCGA-06-0749	TCGA-06-0132	TCGA-16-0846	TCGA-S9-A7IX	TCGA-FG-A713	TCGA-VM-A8CA	TCGA-S9-A6WQ	TCGA-HT-8019	TCGA-E1-A7YK	TCGA-06-0168	TCGA-CS-6290	TCGA-S9-A7IZ	TCGA-TM-A7CF	TCGA-S9-A6WI	TCGA-FG-A87Q	TCGA-HT-8564	TCGA-26-5135	TCGA-DU-A5TU	TCGA-41-4097	TCGA-06-0645	TCGA-P5-A731	TCGA-DU-7011	TCGA-CS-6669	TCGA-S9-A6TS	TCGA-S9-A6UA	TCGA-QH-A6CX	TCGA-06-2557	TCGA-28-1753	TCGA-S9-A6U0	TCGA-06-0882	TCGA-06-0158	TCGA-27-1837	TCGA-HT-8110	TCGA-32-2632	TCGA-DU-7012	TCGA-QH-A6X8	TCGA-FG-A6J3	TCGA-DU-8161	TCGA-HT-8563	TCGA-32-1982
Camptothecin_1003	0.0323657	0.334607	0.132594	0.0763772	0.191052	0.116704	0.119283	0.103701	0.0483397	0.0688726	0.083487	0.0427508	0.113883	0.260931	0.0632485	0.0823345	0.35621	0.0732279	0.0772974	0.0494076	0.164729	0.208809	0.30539	0.122235	0.0897249	0.0452331	0.0429791	0.257401	0.0284103	0.142981	0.115364	0.520967	0.105385	0.0736685	0.253142	0.0598004	0.0418665	0.0563069	0.0708088	0.0729253	0.0453388	0.0801117	0.0993899	0.144059	0.0975854	0.0383447	0.10646	0.0672048	0.0360237
Vinblastine_1004	0.0132233	0.119933	0.0496577	0.020932	0.0399207	0.0446332	0.0349167	0.0802501	0.0118467	0.0259338	0.0314527	0.0359061	0.040746	0.0687206	0.0334802	0.0199148	0.106478	0.0229421	0.0599105	0.0131019	0.0360602	0.0264237	0.12191	0.0422534	0.0231017	0.0161982	0.0121689	0.0454314	0.0167784	0.0418771	0.0271626	0.108463	0.0166168	0.0310267	0.119214	0.0187542	0.0146668	0.0317783	0.0448767	0.0484464	0.0248542	0.0232104	0.0597964	0.0256122	0.036097	0.0154882	0.035808	0.0173315	0.0215385
Cisplatin_1005	10.6189	104.266	31.6251	24.1899	44.7309	29.2733	24.1807	38.7842	11.3351	20.0338	15.7158	10.2791	35.5273	77.4496	19.4242	23.0967	102.463	22.2778	20.4383	15.3089	50.287	55.6191	82.7594	35.9523	22.7208	11.9005	10.4715	76.0507	7.8048	30.8401	24.2108	111.53	22.782	24.0349	81.1775	13.602	10.4033	16.6855	30.5885	42.4022	13.5331	20.4649	24.0117	28.1382	27.4589	8.98585	28.4021	15.2906	13.943
Cytarabine_1006	2.20956	23.679	12.4471	9.28496	11.8343	10.0389	5.7932	10.5291	1.3725	5.79489	6.26995	3.46742	9.31859	17.8956	5.92211	4.54562	20.1505	3.9608	14.1202	3.01566	10.8772	9.37631	18.7445	8.3841	5.88023	3.94867	2.77305	15.3938	3.27657	9.22309	5.61626	27.2776	4.05813	4.9789	24.3306	4.25267	3.02176	3.91372	6.6444	12.2004	4.96636	4.57673	9.36015	7.16584	7.93869	3.85507	8.2406	3.32124	2.80823
Docetaxel_1007	0.0069702	0.0532025	0.0278423	0.00926246	0.0227131	0.0209433	0.0150168	0.0171005	0.00873846	0.00989665	0.0122846	0.0121856	0.0206477	0.0308267	0.0143438	0.00857209	0.0474792	0.00964308	0.0161123	0.00693774	0.017055	0.0163111	0.0446316	0.0163035	0.0144494	0.00694584	0.0068764	0.0348904	0.0064388	0.018643	0.0125488	0.0645514	0.00855423	0.0143702	0.0333048	0.00887902	0.00664929	0.012271	0.0214598	0.0202509	0.00997155	0.0141922	0.016204	0.0213146	0.0104478	0.00486995	0.0204868	0.0097143	0.00897793
Gefitinib_1010	16.31	53.2595	33.3325	27.1639	29.2184	35.9846	28.1723	38.0196	14.6252	28.1667	26.4974	22.6671	31.2231	34.9173	28.5418	18.6823	34.2157	24.0914	29.3958	18.8343	29.6568	27.8478	40.5933	28.6666	20.7196	35.7277	14.0367	53.6052	24.9522	30.998	22.6637	34.6559	20.7958	42.7524	47.2274	22.1541	27.1119	28.1622	35.2594	30.909	30.4458	18.9721	35.087	20.5292	26.2414	31.4228	24.3085	14.4058	36.0865
Navitoclax_1011	7.38464	16.4858	5.51232	8.18675	7.04433	11.8315	4.8635	36.715	3.6982	16.4138	13.4393	4.74618	6.46216	6.12956	11.2222	7.72485	5.95953	8.6924	16.374	6.24278	9.33909	5.50926	6.767	6.20296	4.72406	7.19741	5.38945	18.2641	6.46439	8.12154	5.50115	5.92238	6.06964	10.8248	22.3634	3.19575	4.38061	11.8321	13.0934	7.68148	9.18189	5.36174	7.8927	9.24682	3.6654	18.8878	3.9629	7.13663	9.54865
Vorinostat_1012	3.41253	8.32433	4.66363	3.5194	4.74881	7.88182	3.84367	9.27856	4.03855	5.36049	8.10828	5.35015	5.88633	4.32002	4.68594	2.89506	4.93902	3.70937	15.7748	2.93427	4.29042	3.14744	4.90156	6.92789	4.44434	5.34687	3.44072	11.2731	6.26347	6.00878	4.05461	4.57856	3.02714	6.38097	9.33063	5.47614	5.23864	7.43077	9.95485	7.21106	6.28632	4.30061	11.7282	4.47713	2.81073	4.73296	5.55185	5.92488	7.37195
Nilotinib_1013	21.7941	84.5847	47.4219	51.4525	47.6833	48.9099	38.3894	60.053	17.3759	35.404	32.2517	32.0324	49.9825	52.5889	46.6882	28.129	53.0627	23.6892	68.0984	25.7773	44.9485	41.8031	49.9361	38.0579	51.3748	30.7703	20.4195	84.1668	25.7163	49.4391	32.6473	61.3119	26.9762	53.3504	59.6054	26.4306	32.6959	36.5422	50.9896	55.3586	38.8628	30.5951	40.9634	36.478	47.2586	36.5556	40.7678	26.8127	25.8185
Olaparib_1017	56.8483	158.914	88.5653	68.2822	97.4523	97.3937	76.8346	102.265	42.8315	82.8326	72.2607	51.1054	107.072	119.612	68.1133	56.531	151.809	66.7321	74.9238	42.7574	107.207	88.8056	149.949	75.9353	70.1669	64.5766	46.1577	173.602	54.079	87.6072	60.4961	187.058	66.7168	88.4885	210.594	63.1405	47.1433	65.8309	108.178	97.6238	62.2664	74.7083	95.7565	89.3405	67.8645	48.5197	102.162	50.0063	70.0128
Axitinib_1021	14.0724	19.0156	14.284	24.5224	14.4041	13.0309	14.3183	21.3136	14.1769	9.8855	12.1705	18.0084	13.8501	18.5793	13.77	17.8352	16.2062	18.6333	23.5634	18.9765	20.4857	23.1115	15.9443	14.3088	11.8814	17.5259	14.0746	21.1016	14.8284	15.5767	17.237	19.2847	18.6943	23.9233	32.3406	13.4589	14.9055	21.2719	16.7785	22.5331	23.8089	12.4702	15.624	15.8603	18.2408	20.4054	15.7077	18.9169	14.3473
AZD7762_1022	0.444697	2.56398	1.29704	1.15176	1.50601	1.1175	0.793588	1.52723	0.334102	0.888075	0.847588	0.438769	1.57997	2.60342	1.54005	0.858292	3.25631	0.592959	1.49467	0.691035	1.51294	1.37154	3.51426	1.22029	0.779205	0.386144	0.44234	2.02058	0.369349	1.57237	1.05028	4.11688	0.802399	1.23853	2.77178	0.573111	0.398528	0.73333	1.18518	1.27151	0.448856	0.836241	0.922407	1.08452	1.68346	0.586744	1.12035	0.438212	0.735182
SB216763_1025	138.154	193.534	127.798	225.207	154.281	123.52	153.207	188.13	79.696	138.335	105.944	153.438	153.67	188.196	158.069	184.42	183.664	157.532	204.855	138.554	171.752	223.014	181.134	145.357	141.779	210.707	178.861	137.75	129.022	168.011	132.444	169.816	185.884	153.123	220.424	151.964	152.203	161.002	137.62	184.312	214.409	124.323	173.355	96.67	230.177	241.241	132.292	90.3186	135.096
KU-55933_1030	73.3759	82.1371	46.7278	107.714	60.3424	37.1146	57.8981	76.5434	36.5573	49.6518	30.8328	56.9996	51.5171	77.2478	77.699	82.6294	75.8594	74.2225	46.2717	60.0977	76.3187	115.024	81.0579	53.8217	49.7565	65.6414	82.9867	51.7228	37.4677	64.5273	51.0223	73.4193	100.352	56.0568	79.6788	49.168	42.8793	45.5504	48.8817	61.8927	60.3783	38.6606	42.5772	34.3092	113.743	80.412	42.5265	30.6137	46.6313
Afatinib_1032	4.29355	13.7565	9.6467	6.08904	7.09375	10.5358	6.68873	13.7591	2.96203	9.05388	9.67269	4.97579	7.25801	10.6663	9.2234	4.34741	11.9325	4.76454	8.48631	3.68016	7.96017	7.44551	14.5571	7.26744	5.70271	8.63037	4.15479	13.7484	7.3393	8.16823	4.90987	10.9005	4.88946	9.86042	13.3889	6.26341	6.30138	5.68671	6.61412	6.33954	7.32987	4.79394	10.4708	5.25138	6.79985	8.0201	5.8443	4.08106	12.304
Staurosporine_1034	0.0294337	0.0935695	0.0449379	0.0482338	0.0595691	0.0531052	0.0372795	0.0630543	0.0157021	0.0554317	0.0383324	0.0365868	0.0590853	0.129833	0.062301	0.0378176	0.173138	0.0325906	0.0448525	0.0304215	0.0700855	0.078926	0.186551	0.0472355	0.0441323	0.0279409	0.0286336	0.0672022	0.0181419	0.0564409	0.0364932	0.234297	0.0378233	0.0459648	0.134152	0.034652	0.0159752	0.0219348	0.0443466	0.0399596	0.0311348	0.0468645	0.0635119	0.0338731	0.0722317	0.032825	0.0481871	0.0191026	0.0278524
PLX-4720_1036	65.3955	86.4898	84.8852	93.8481	90.786	72.0112	48.8626	75.9156	42.9864	90.4175	66.2044	54.294	67.7242	132.697	121.507	88.6635	164.332	70.9231	86.3874	50.7225	116.844	126.846	196.48	57.6116	51.8485	37.6312	54.215	78.0043	44.9488	86.7951	78.8408	179.72	106.032	62.791	101.439	56.073	45.7102	44.734	62.6891	76.2703	45.1334	46.4172	89.2654	35.3859	133.039	64.5287	34.5263	39.3535	63.9542
NU7441_1038	14.2115	15.6916	11.6029	17.5572	12.3224	10.4612	12.6959	18.8247	9.31107	13.1003	9.03368	14.9185	11.8585	14.3169	13.7473	15.0502	14.2194	14.1673	14.084	12.9754	13.9113	16.7318	15.0615	12.9377	10.8166	12.6249	15.1709	12.3567	9.98591	12.1121	10.4426	13.9581	15.1463	11.825	16.8013	11.2191	9.91618	10.7328	11.9234	13.9707	13.3078	10.4333	11.9892	10.0567	15.5461	17.2363	11.7897	8.86842	10.5675
Doramapimod_1042	98.0195	97.1232	64.8815	117.607	72.7712	79.3942	83.9305	180.255	60.9606	95.8946	74.7447	98.9988	81.5737	69.4308	97.0892	97.6484	71.2935	90.9873	134.312	78.2097	82.5361	88.3517	72.6054	91.0494	63.4734	127.336	112.25	91.8612	102.855	82.6835	61.9098	63.5306	86.1119	90.7021	122.28	88.4125	85.1115	96.4791	88.5048	100.256	119.877	67.2308	109.098	61.6971	83.7268	188.257	65.6706	78.2484	104.305
Wee1 Inhibitor_1046	6.52401	23.6404	10.3806	10.1206	10.5399	12.9007	8.91203	32.9358	4.48216	11.6073	11.8088	6.87619	12.7211	10.9857	12.3001	6.89734	12.7823	6.54601	24.9653	5.62862	8.72588	6.1127	12.6519	11.5978	5.76171	6.15157	4.87997	27.0889	7.4838	10.5084	6.38132	12.1715	6.5517	12.2177	34.2111	7.26421	6.48021	10.4361	18.0153	13.6143	8.12069	7.66146	18.1606	8.40623	7.65049	7.02886	9.24216	5.26617	10.5409
Nutlin-3a (-)_1047	47.9178	141.772	171.91	151.592	128.628	97.688	116.976	65.051	58.1725	165.115	76.8417	87.2485	106.217	155.855	91.3597	101.846	233.02	91.9986	81.3741	88.9473	204.725	162.72	275.708	86.6259	178.369	49.56	68.6696	75.2494	33.1485	100.748	118.047	273.593	140.35	46.3284	205.791	86.8755	38.0148	57.8212	77.611	125.378	63.4252	81.8397	63.5158	98.3758	72.8189	96.8202	86.5723	66.4696	47.655
Mirin_1048	66.1334	132.301	92.5323	96.6891	115.795	120.128	94.1393	110.918	66.1357	96.4706	102.512	72.5423	104.637	134.873	149.346	93.1763	158.043	84.0487	111.836	87.3279	149.058	123.096	161.716	100.288	103.088	64.2909	66.8581	156.027	75.8406	142.004	123.587	205.32	105.976	122.85	253.168	84.3144	72.142	103.978	117.256	100.619	93.2645	97.4579	101.136	113.644	82.2411	55.913	127.215	107.074	101.607
PD173074_1049	46.2976	109.054	53.3642	60.1498	70.5176	83.3372	51.0656	183.55	20.6118	113.975	72.5978	36.1492	76.237	82.1582	88.2886	46.65	106.9	41.4817	79.5852	35.0429	74.5355	57.0712	119.754	59.0753	37.4234	48.5571	39.9876	116.49	41.0943	75.4981	52.5712	105.748	51.9502	84.8497	130.873	35.0835	37.1826	45.6707	76.1963	64.2551	49.9612	45.7197	92.53	40.2327	72.195	88.6455	48.7442	22.4848	65.4408
ZM447439_1050	18.7906	20.3054	17.376	20.4495	18.0046	17.4447	16.8003	22.3743	15.7302	17.8738	17.7606	17.5394	17.164	19.7666	20.6293	19.5879	20.0233	19.2053	18.0228	18.6948	19.6335	21.015	20.6524	18.0534	16.2213	17.7754	18.8535	18.5929	17.0211	18.7269	18.2205	20.3727	20.1587	18.7339	21.7284	15.7154	16.1157	17.4408	18.0835	18.0469	17.7961	16.0748	16.8877	16.4972	19.9131	21.2127	17.3528	17.31	18.0946
Alisertib_1051	6.33583	21.5265	6.29636	7.24559	10.881	9.1098	9.36165	21.7643	3.98216	10.2971	9.22269	5.4065	6.38431	11.3594	15.7421	5.67375	16.1564	9.3931	8.78504	5.54831	10.8047	9.84757	15.3993	10.5865	5.19425	3.27046	3.70473	22.817	4.01016	9.38592	4.85245	17.3528	4.42198	9.32999	46.3007	6.04198	2.76402	7.78204	12.2878	9.69625	5.18359	7.97043	12.9935	10.3619	4.52771	6.18536	8.69599	7.49563	4.7845
RO-3306_1052	23.3568	22.6819	19.8273	24.7549	19.9378	19.5991	21.6724	27.5535	20.4311	20.9974	19.1226	23.2677	19.2489	20.2816	21.5078	23.0095	19.385	23.93	22.5054	22.3624	20.5975	21.6513	20.1256	21.5692	18.1513	21.6418	22.0854	20.8239	21.2663	19.8809	19.5262	18.9104	22.7041	21.8952	24.3369	20.7457	20.4227	21.5613	21.2908	22.1427	22.3998	19.1209	21.7855	19.6228	21.9781	26.3088	20.1025	20.0236	20.3254
MK-2206_1053	10.6702	32.739	32.0777	18.6325	25.5543	34.6132	15.8029	27.2616	8.97074	28.8596	20.8356	13.2362	31.912	33.4308	28.9891	12.2146	44.2488	12.0943	28.0067	12.2039	24.6875	26.6255	44.3707	21.9497	20.5429	20.3485	14.4657	47.6535	17.3946	27.2984	20.4198	52.2662	14.5869	32.353	37.5296	15.5163	18.0525	22.0609	38.3785	25.818	24.4664	19.0841	21.2629	23.0595	15.9889	22.0117	21.1929	12.2637	24.7463
Palbociclib_1054	17.2748	55.6894	70.9467	28.6232	58.0367	54.7571	33.3609	36.4875	29.4905	34.7688	43.8728	43.7802	59.5674	72.1866	22.4219	27.1168	111.304	21.835	93.0578	23.1944	60.8162	42.2106	104.973	39.2608	41.031	35.38	26.4475	58.2247	44.8101	50.2804	47.5076	134.098	28.0737	45.044	57.713	46.556	36.9498	40.054	56.8519	78.9006	48.1185	44.3965	72.7627	49.2491	34.8178	15.0748	37.7966	45.8783	32.008
Dactolisib_1057	0.0850467	0.375035	0.431722	0.15678	0.276357	0.319804	0.29071	0.150955	0.144255	0.216954	0.218642	0.129164	0.311074	0.513357	0.12785	0.1807	0.741645	0.131102	0.270346	0.129553	0.245536	0.294407	0.705042	0.219406	0.399877	0.15366	0.1332	0.390792	0.139798	0.25187	0.195744	0.988913	0.140119	0.217031	0.335459	0.237026	0.177893	0.168902	0.255846	0.2808	0.204165	0.286952	0.215373	0.25959	0.160165	0.0839801	0.239218	0.12594	0.125146
Pictilisib_1058	2.00717	8.1995	9.63548	3.23966	5.32666	8.89825	4.01583	4.09078	2.85388	5.7006	6.01511	2.49112	6.32676	11.3186	4.62953	3.29782	16.1562	2.49385	5.00169	2.27187	5.73288	6.05346	17.1785	4.23866	6.82629	3.5607	2.96944	7.86286	3.41926	6.71974	5.0698	22.5775	2.94351	4.92339	6.95003	4.0027	3.14696	4.54368	7.1774	4.48934	3.82492	4.27547	4.85333	5.63541	2.93052	2.49745	4.81058	3.17389	3.88193
AZD8055_1059	0.481869	0.829576	0.625107	0.901891	0.759116	0.44296	0.653461	0.410169	0.465968	0.377734	0.343606	0.512196	0.577973	0.959248	0.513098	0.763479	0.884566	0.707156	0.512806	0.762828	0.762573	1.24548	0.791492	0.600244	0.952142	0.463412	0.628248	0.524204	0.373539	0.695132	0.687915	0.913644	0.702922	0.618662	0.855632	0.524873	0.497088	0.632373	0.496458	0.697373	0.695517	0.596773	0.428726	0.485068	0.979732	0.431259	0.604971	0.529179	0.377688
PD0325901_1060	0.824286	1.6142	1.90631	1.54482	2.1463	1.17593	0.815478	0.939173	0.527504	1.36982	1.14113	1.26393	1.42617	2.90925	1.41597	1.2389	3.9639	1.01997	1.96134	1.16419	2.59072	2.97241	3.71454	0.996168	1.98431	0.809419	1.19732	1.19322	0.446513	2.60814	2.15963	4.77143	1.77052	0.893711	1.59958	0.787394	0.465974	0.57317	0.774512	1.08644	0.779773	1.29268	1.58297	1.79773	2.40293	1.08406	0.873064	0.803818	0.306714
Obatoclax Mesylate_1068	2.78637	5.63833	4.92484	3.87058	5.31552	4.3851	4.77056	4.28125	2.83937	4.01214	3.80096	3.03618	4.95537	5.27986	5.05063	3.9683	6.2426	3.58691	4.85795	3.55504	5.1443	5.14503	5.23331	4.31353	4.3088	3.14362	3.02613	7.35253	3.24541	5.06584	3.87721	5.97962	4.18372	5.06283	6.75077	3.59038	4.18269	3.76102	4.48452	4.88426	3.88654	4.74851	4.58051	4.31769	4.86167	2.09963	4.04006	2.78903	3.23211
5-Fluorouracil_1073	18.6389	221.385	130.015	95.3438	193.298	74.7236	81.587	62.562	26.3108	40.6211	53.9114	45.8284	131.862	336.264	66.0909	56.1805	458.895	32.6511	73.2201	53.5693	235.105	268.509	413.971	72.2616	114.565	35.7089	40.15	91.444	18.1429	164.666	141.673	844.049	76.6067	75.4437	180.49	40.0233	37.0591	47.3163	76.1574	96.9807	56.7132	90.1761	34.6826	137.25	108.676	14.3307	112.904	30.0681	31.3851
Dasatinib_1079	2.19429	10.1702	7.66954	3.78254	9.53178	6.36735	5.20121	4.56619	0.504396	6.07697	2.63922	2.96456	4.99818	29.6308	8.54024	5.03362	37.2059	1.86663	3.02985	2.35588	10.3373	16.3364	40.8528	2.88596	14.7255	1.6725	2.59064	4.72069	0.764476	8.94128	3.56353	42.8489	4.78399	4.55457	10.0196	4.00587	1.36563	0.754739	3.16058	1.51388	3.48364	4.00139	2.52187	3.17324	9.58353	1.51914	7.43777	0.632212	1.56816
Paclitaxel_1080	0.031102	0.550377	0.216027	0.0482647	0.148517	0.259469	0.104871	0.208577	0.0415066	0.0793336	0.141354	0.078349	0.141232	0.245451	0.137793	0.0419472	0.410676	0.0463923	0.194822	0.0306784	0.113818	0.0877976	0.425038	0.151149	0.107126	0.0448611	0.0367953	0.498817	0.0436618	0.133166	0.0700858	0.661777	0.0400582	0.10201	0.337877	0.0455305	0.0399243	0.107838	0.17195	0.181056	0.0760889	0.0922616	0.133382	0.111861	0.068357	0.0301022	0.129555	0.0452141	0.0794305
Crizotinib_1083	16.5131	68.2988	41.898	30.8784	40.0411	40.6294	37.041	93.6478	12.4056	37.2253	36.2597	22.5288	32.7306	58.4574	49.6974	24.3059	79.1141	23.2673	36.7691	22.1292	37.0407	35.9073	73.329	23.8945	28.0589	19.5045	17.8525	36.7114	12.885	39.2194	29.5698	95.27	26.8429	33.8285	66.3466	15.631	14.062	25.5691	32.191	21.3069	25.1638	22.0258	26.3954	23.3662	29.3454	31.3805	19.646	12.2666	17.119
Rapamycin_1084	0.0367738	0.27123	0.250184	0.133869	0.208614	0.160732	0.159398	0.0987896	0.081463	0.089769	0.1133	0.0563427	0.150915	0.409938	0.0812979	0.114819	0.464078	0.0846599	0.123902	0.0883966	0.180615	0.300724	0.465121	0.114004	0.200827	0.0828004	0.0592637	0.202454	0.0537194	0.141043	0.149857	0.620945	0.0948378	0.140071	0.132685	0.069447	0.0956981	0.0986721	0.104639	0.116759	0.0865107	0.132046	0.0634498	0.178415	0.143945	0.0358007	0.0999678	0.0651574	0.043907
Sorafenib_1085	8.67079	26.354	16.9724	15.3548	13.9335	16.4797	12.9465	16.0875	11.254	13.3412	12.333	11.3709	14.7402	19.0789	15.6462	10.5318	16.0213	12.9304	20.0907	10.3504	15.2216	14.388	17.3254	15.8052	11.4788	11.5788	7.38621	29.9245	12.3176	18.1062	12.2981	20.1733	10.2307	19.8989	32.9329	10.0545	12.5372	23.7678	18.5334	22.1709	15.0637	11.1196	17.3654	16.5009	14.1461	12.6017	13.7443	16.3035	14.2383
BI-2536_1086	5.4465	4.60331	3.61288	3.87775	2.84585	3.25389	3.86455	10.0719	4.88134	3.45255	3.54863	3.49927	2.07119	1.74096	3.34542	2.77168	1.61397	4.37731	4.06603	3.28225	2.42967	1.43176	1.83214	2.83858	1.70168	2.2161	2.65022	3.28092	3.64625	1.58993	1.35673	1.33151	1.96395	2.86665	4.05989	2.43009	1.69658	2.54062	2.91139	2.30476	1.84516	2.10209	3.40195	2.51103	1.39878	5.6071	2.90717	3.1576	2.22231
Irinotecan_1088	4.98721	43.4404	19.8598	11.5764	24.0924	19.6814	14.309	15.9026	9.35992	9.28261	13.2991	6.65466	18.415	27.5851	8.045	10.8839	41.9058	9.52712	12.8562	7.69144	22.6092	24.6403	35.3523	21.6508	13.4019	7.67897	6.00925	49.2214	6.21126	18.7221	16.1399	55.9229	14.6989	14.171	49.4354	10.7547	6.35185	10.1949	13.4437	14.9543	7.50755	11.3047	18.587	21.2317	15.0879	6.34951	22.4637	15.1922	6.50561
Oxaliplatin_1089	18.6015	110.208	73.389	39.4081	64.2903	61.6009	63.3536	50.9124	19.7055	32.6502	34.644	25.2314	66.0675	91.9417	35.0728	28.2453	131.012	39.9394	54.5261	25.9172	76.5482	58.8754	121.821	47.688	69.4189	26.4505	18.3309	93.4661	21.6692	61.2598	44.9262	157.537	32.3415	71.8772	106.507	35.4207	27.9685	35.0776	45.0268	62.4326	23.9249	36.5368	33.3358	73.7476	35.1016	22.9465	42.0005	35.1692	22.3492
BMS-536924_1091	6.4718	9.3917	9.34568	5.82961	8.31684	8.20004	5.91342	7.76662	5.02105	12.1802	9.97408	10.6907	9.78898	10.8329	7.95104	6.94393	14.569	6.28602	7.62597	6.23766	8.79211	8.92234	16.9734	8.24438	5.77401	6.05365	5.68098	7.63268	6.55024	9.86264	7.9317	15.5673	6.72386	6.53219	11.2004	10.1418	6.3893	6.79434	10.3189	10.8197	9.96438	8.32466	12.2921	6.83749	10.5676	7.20931	6.07739	3.95916	8.03976
GSK1904529A_1093	53.1413	135.754	112.69	87.9529	94.62	115.681	100.808	136.716	71.5847	67.9419	93.5562	71.4683	98.4876	91.3147	91.5085	62.2098	97.9172	69.9482	124.617	60.158	89.5279	76.7253	97.9002	81.8847	61.5605	70.9776	52.2213	169.83	84.2343	91.3752	82.2506	121.781	69.7196	163.976	122.598	56.7425	79.276	89.0794	102.59	97.297	70.6894	61.3477	96.1179	80.665	68.9132	66.1154	92.2504	90.7938	76.3707
Tozasertib_1096	27.6492	29.5903	17.0032	38.62	16.2145	16.9321	16.4546	58.529	17.9573	16.6586	17.1996	22.0202	11.518	18.2232	24.4997	22.6436	16.6727	29.2608	25.151	24.4181	18.9562	19.5317	17.208	20.5317	9.76486	16.5602	16.7817	21.9147	18.5357	15.0911	14.3739	17.7919	18.5316	25.2134	51.4733	11.0913	10.9281	22.489	19.7106	19.0341	19.8918	13.7742	17.3181	15.4537	18.1089	33.2832	15.858	21.8324	14.2603
PF-4708671_1129	17.5939	37.8473	31.6751	35.4318	33.7366	24.0438	23.4707	19.6055	20.6636	16.3967	21.9743	22.5276	29.5352	55.9583	28.8488	33.2769	48.8299	32.3999	27.4315	32.233	42.4556	64.1049	49.2411	28.2898	29.2717	25.4181	23.7469	33.1651	21.2884	38.7567	44.6517	67.5046	41.1683	32.456	49.1525	21.5398	23.6197	31.3901	28.5237	32.2753	30.48	22.4097	21.3099	31.8366	44.6077	21.4215	33.4861	32.9208	20.5695
PRIMA-1MET_1131	70.9969	173.56	127.233	97.0435	142.92	178.584	102.514	213.801	52.4455	158.616	168.029	73.8339	135.827	132.424	157.526	70.8376	173.199	84.2165	176.198	75.2699	139.108	101.717	138.093	117.494	128.335	73.198	92.3663	208.022	72.0123	148.888	113.243	180.292	87.702	166.869	157.958	56.7174	82.8848	89.9411	170.803	94.2621	92.7119	120.026	106.752	125.553	56.0307	97.0269	123.303	77.3767	85.0158
Erlotinib_1168	10.9569	31.4012	18.6222	16.8767	16.8718	16.0582	15.6271	18.7235	8.37346	13.0889	9.68012	14.7296	17.2088	21.7767	15.754	11.816	19.7288	15.0767	11.7768	10.1918	16.598	16.0116	21.4553	15.3368	14.2325	18.377	9.15837	27.3438	13.3247	18.5714	9.40263	17.5672	12.9491	22.0709	27.8373	10.0469	12.8193	14.9971	15.0783	18.8897	15.3202	9.95107	15.7383	10.0313	15.3138	13.1183	14.1694	10.6142	18.9206
Niraparib_1177	49.949	129.575	95.9558	62.7061	109.791	130.333	102.59	148.472	52.0468	106.282	97.9502	53.9587	118.393	109.856	94.6315	64.5535	150.95	66.8442	139.862	47.2683	117.066	83.7822	147.363	80.7688	78.4693	66.0838	62.5289	236.891	67.0252	92.7467	75.8275	173.624	69.3939	111.362	178.742	68.4747	57.6503	63.463	106.843	99.5342	56.0787	84.9892	161.347	108.554	61.7234	78.9973	101.951	68.3012	71.0225
MK-1775_1179	1.12351	8.18235	3.19081	1.97513	3.70716	3.74026	1.74532	6.34527	0.997111	2.46908	3.26758	1.32092	2.62938	5.42601	3.35719	1.85347	8.08743	1.44575	3.36395	1.20764	2.19405	2.22892	8.21897	2.73106	1.09462	1.28738	1.04132	4.90329	1.17509	2.76609	1.73118	9.22481	1.46632	2.52487	7.4017	1.54986	1.1703	1.65759	3.69908	2.01421	1.81016	1.60325	2.08108	1.74711	2.43658	1.28291	2.35858	1.03966	1.86689
Dinaciclib_1180	0.043334	0.125972	0.080345	0.0675942	0.0996681	0.0754709	0.0513665	0.106672	0.0247757	0.0758973	0.0434173	0.0499375	0.0706122	0.171718	0.130524	0.0555818	0.247912	0.0518098	0.0611198	0.0368214	0.085155	0.0950824	0.282799	0.0690126	0.0452482	0.0530338	0.0515872	0.100146	0.0374926	0.0813184	0.0451685	0.335875	0.0565143	0.0567425	0.120528	0.0280801	0.0420061	0.0447791	0.0520644	0.062141	0.0550251	0.0417676	0.0488192	0.0433408	0.117548	0.0468877	0.0538674	0.0291087	0.0463832
Gemcitabine_1190	0.0780639	3.8821	0.834212	0.547081	2.10376	0.488804	0.437823	0.39398	0.0723115	0.192661	0.191914	0.136109	0.498723	3.25503	0.379274	0.391102	3.85652	0.261834	0.270984	0.181482	1.27747	2.4097	3.1478	0.448081	0.489323	0.217313	0.177433	0.870533	0.0614891	1.17353	0.696861	9.60318	0.576973	0.0971853	1.66176	0.169779	0.163099	0.15016	0.311826	0.383045	0.254231	0.27357	0.439829	0.771521	1.16296	0.129359	0.590995	0.164343	0.072151
Bortezomib_1191	0.00641302	0.0127753	0.00932173	0.00827994	0.0106348	0.00816466	0.00723096	0.00764282	0.00468975	0.0077233	0.00706691	0.00589953	0.00808426	0.012844	0.00970288	0.00794524	0.0144197	0.00689977	0.00857339	0.00623502	0.00999452	0.0109483	0.0130528	0.00856014	0.00899459	0.00569186	0.00669681	0.00895584	0.00522684	0.00881051	0.00836541	0.0144605	0.00783051	0.00782084	0.00908279	0.00577988	0.00659432	0.00689627	0.00868369	0.00867136	0.00521367	0.00647591	0.005588	0.00631605	0.00716569	0.00555313	0.00575967	0.00400735	0.00555554
GSK269962A_1192	10.594	19.8977	16.2063	16.6603	16.4253	13.2093	13.1309	15.2342	10.1758	10.36	12.257	12.0407	14.3868	22.704	14.5305	16.0265	20.8188	17.0727	15.1797	15.4983	20.9732	25.025	23.6695	15.9694	14.1311	11.6527	12.8864	16.5451	10.3938	15.7541	15.9091	25.1071	17.1421	15.5212	22.974	10.1491	9.90915	14.4058	14.9768	15.3887	14.48	13.0114	9.52183	14.7433	19.5191	14.005	17.5097	14.8717	10.2767
SB505124_1194	11.7762	12.4168	14.2141	9.46662	11.1721	15.0115	14.1826	11.9416	13.0706	12.1931	12.9496	13.8796	13.7203	10.4436	9.20728	8.8705	11.5728	11.165	16.8388	9.50406	10.8931	9.35402	11.7501	11.2912	11.2795	14.8229	11.5703	14.0283	14.0411	10.3771	10.0867	10.1958	9.67831	15.5435	10.3681	15.401	13.7374	12.8879	13.5558	11.7463	12.9161	12.5313	17.2862	12.4543	9.42187	11.5524	12.1477	9.70038	12.4903
Tamoxifen_1199	27.2755	59.8137	50.6858	36.2438	36.9838	42.3961	34.4988	39.5028	30.139	39.4682	43.6879	36.2164	46.6981	45.2099	35.6141	31.4254	43.7165	30.8863	53.4353	26.3441	37.7434	38.0851	50.2857	43.4494	40.6096	32.4074	29.2715	63.846	36.5879	42.8644	34.0246	51.2611	28.7654	42.8258	46.2334	36.4892	33.754	35.2501	52.2606	47.3748	33.9054	30.5293	47.0368	43.2845	35.4052	26.2379	37.796	25.5454	38.1071
Fulvestrant_1200	14.5804	38.9978	22.186	22.205	23.1665	26.5719	18.484	34.6731	11.969	25.9472	21.2703	20.4564	23.692	27.9742	27.3983	18.4881	27.928	17.5905	23.427	13.9072	23.1315	19.7659	30.7188	24.0362	15.256	19.6115	14.6685	30.3275	14.5951	27.0208	17.5236	30.376	17.9227	21.6349	38.6436	13.1205	15.4468	25.337	26.3219	22.2097	20.0758	16.4403	21.2241	18.6606	19.8383	20.9914	18.7313	12.4009	20.6444
EPZ004777_1237	122.035	278.954	173.729	221.61	190.631	170.734	125.993	299.83	86.5071	174.39	158.674	126.082	167.102	228.817	241.399	156.601	251.979	139.556	177.166	142.313	231.361	212.55	285.156	138.011	121.314	125.059	122.976	229.224	97.2136	220.808	172.951	282.742	171.34	167.896	351.089	97.2496	97.3866	120.064	167.599	159.811	138.661	116.339	194.641	149.554	184.077	158.961	134.344	94.7229	135.026
YK-4-279_1239	6.00119	43.7313	15.4945	7.3818	13.9188	15.4533	11.792	26.9741	4.80733	11.4143	11.3676	11.4751	15.6041	30.3681	12.7343	8.59762	44.583	9.55491	15.1915	4.81062	14.9111	12.9672	47.5305	14.69	7.79615	7.32711	5.79521	22.5357	5.61556	13.3588	7.20832	51.7318	7.422	11.6226	39.9546	9.15151	5.82124	8.41294	17.8775	16.9499	8.64561	8.76304	15.4606	10.1595	14.0906	6.5384	11.7622	6.56577	7.33831
Daporinad_1248	0.020261	0.0229718	0.0304641	0.0112488	0.0224323	0.037357	0.0154224	0.0481168	0.0116682	0.020433	0.0291623	0.0275361	0.0242469	0.023021	0.0160347	0.00713894	0.0262812	0.00936011	0.178803	0.00729064	0.0147619	0.00812345	0.0222155	0.0277699	0.0110998	0.0217507	0.019925	0.0340692	0.0479945	0.0212351	0.00679579	0.0287775	0.00516481	0.0139564	0.0420679	0.0104558	0.0169125	0.0337097	0.0639021	0.0297312	0.0190478	0.0169116	0.059423	0.0192958	0.0179548	0.0221912	0.0608845	0.0240712	0.0171183
BMS-345541_1249	22.1766	49.7654	42.3022	25.6296	38.8978	43.994	33.8471	67.4186	18.9245	31.998	32.2392	24.2248	36.7823	41.5699	37.2904	19.9785	54.6857	21.8995	37.1842	21.1154	39.1027	28.6251	50.7613	34.2686	29.8857	25.7386	16.0552	69.6781	22.3319	33.8688	32.1079	60.6349	22.9266	55.0876	73.9455	22.7268	34.5951	29.7376	35.3285	34.8725	29.7853	32.9901	29.9248	59.3415	26.8609	33.3472	48.7166	32.3523	28.5169
AZ960_1250	4.24384	14.5753	6.76503	7.03682	12.9604	8.51593	8.99461	17.1946	2.66725	10.45	7.52795	4.59324	7.9466	16.4015	12.2465	7.56112	27.0277	6.3199	7.16117	5.04497	11.2539	12.6892	28.1015	6.80139	6.70443	4.48724	4.15346	10.33	4.21498	9.34722	6.62712	32.6497	7.83326	6.46045	22.3359	4.59814	3.64922	5.32075	7.80534	6.85835	4.77663	7.64527	7.11623	7.2936	7.19979	4.64429	7.97199	2.77885	6.91375
Talazoparib_1259	9.89763	107.941	42.577	25.9597	48.0908	49.7461	42.9097	49.2424	17.0995	27.0892	28.4594	15.9251	36.7509	92.2394	19.3067	30.1656	123.402	28.623	27.4592	15.0714	42.69	52.0745	112.146	36.9325	25.6097	19.3489	11.6744	85.2315	10.5348	30.9168	23.5896	162.083	28.3548	23.6196	97.4356	23.2494	12.1294	17.873	27.1783	38.7023	17.724	21.8576	23.586	31.4399	29.4567	15.287	42.7049	17.4556	14.6358
XAV939_1268	57.4451	88.8458	73.3793	88.1252	92.5359	69.7826	65.1909	91.7266	45.5746	67.7366	65.1929	54.7213	74.0795	94.5387	101.101	67.4529	105.842	63.5497	57.1644	70.8216	97.1347	101.84	108.212	60.358	78.2248	64.2482	54.3179	93.524	55.8612	87.9233	82.7256	124.13	93.2999	74.2977	102.26	55.3409	58.4347	60.4279	72.7673	77.4433	73.1768	58.3469	63.1949	63.7027	82.8089	58.3131	64.0225	54.818	65.1956
Trametinib_1372	0.885317	0.830058	1.50153	1.01976	1.74023	0.941009	0.598578	0.319733	0.719549	1.11084	0.890617	1.03427	1.34083	2.78015	0.772074	1.37167	4.06801	1.0211	2.01554	1.22691	2.07767	3.00503	3.18862	0.863551	2.53779	0.858209	1.35401	0.843584	0.527503	2.38409	1.81538	5.01935	1.49497	0.731145	1.21304	1.51316	0.444008	0.535515	0.5954	1.22263	1.16554	2.14106	1.62387	2.44996	2.79234	0.632487	1.04186	1.59034	0.23997
Dabrafenib_1373	64.6612	101.607	91.0939	108.013	88.2672	58.7046	44.7509	45.8814	56.6776	61.2599	55.3975	108.726	69.5127	99.0397	84.849	74.2679	88.136	80.0569	114.556	69.7401	112.946	114.169	92.0319	76.8057	71.1642	66.967	75.9357	99.7895	64.7006	126.977	104.045	105.767	84.9561	71.2729	144.974	69.9447	53.5325	76.3776	58.7541	165.449	69.1425	71.8628	122.617	91.7162	129.706	49.3711	54.9263	92.3562	47.9144
Temozolomide_1375	236.845	634.974	377.267	345.17	461.124	469.28	293.307	560.24	217.586	425.115	328.257	338.463	478.106	533.253	463.666	332.581	596.629	260.745	460.491	245.114	543.796	487.777	629.776	438.164	316.494	291.488	283.955	766.085	214.115	555.892	398.722	656.21	382.611	413.552	798.571	233.146	263.765	374.696	526.223	443.767	286.63	305.527	445.767	478.326	353.502	267.569	510.173	226.692	356.756
AZD5438_1401	5.72818	17.3994	7.53088	11.6449	12.1406	7.89996	9.67815	9.97436	4.23694	8.28373	5.39947	4.88174	11.8585	16.2363	11.3177	8.33189	18.9983	7.08465	8.82184	5.56173	16.8092	15.671	21.8475	9.32083	8.59066	5.69687	6.44768	14.6742	4.21643	11.6492	8.03544	31.8751	10.1265	10.6048	16.9533	4.62559	5.67053	5.90798	6.39291	13.4396	5.31812	5.21683	6.32523	6.57184	11.8657	5.50307	8.69185	5.00348	5.4839
IAP_5620_1428	98.2618	282.39	137.756	261.668	266.775	172.187	178.099	228.322	43.8288	150.791	95.5302	109.641	278.453	298.548	264.74	185.926	305.208	105.086	65.8417	125.577	238.184	293.476	304.225	190.401	262.859	121.604	110.26	436.765	47.0909	265.208	191.907	353.728	198.428	223.154	355.813	67.8388	76.3826	90.7605	126.187	152.905	83.3532	120.536	65.4527	125.073	287.006	94.0143	235.745	21.6983	56.8274
AZD2014_1441	3.68209	10.5679	11.2132	7.33211	9.15305	8.76887	9.40377	5.78438	6.44006	6.44959	6.59113	4.333	7.50823	14.3551	7.79142	7.79453	18.4436	5.55004	4.51586	5.53298	8.76563	13.4612	20.6941	6.61507	11.7984	5.05263	6.87776	8.56229	3.88442	12.182	9.33143	24.4151	6.76597	8.59209	9.16253	5.68858	5.6407	5.00482	5.48895	6.77536	5.35581	6.68129	3.64002	6.636	7.72544	5.05199	7.44805	5.86267	5.16571
AZD1208_1449	223.866	331.327	156.016	257.015	197.854	238.453	190.902	534.363	140.633	305.582	227.418	194.367	218.832	174.816	306.618	186.431	188.898	218.587	222.538	172.399	190.168	157.978	206.76	290.825	122.723	225.689	186.647	360.478	214.938	255.224	181.761	176.26	197.121	250.823	470.278	162.656	185.536	253.428	272.115	267.435	212.489	142.826	277.401	142.474	202.015	368.25	168.766	139.764	299.059
AZD1332_1463	28.4854	45.6927	32.1299	45.9678	47.7604	32.4007	41.3098	55.2088	32.0981	41.6175	35.7271	24.2977	35.1369	56.1871	42.8131	45.837	68.4482	38.7511	24.7948	50.5157	49.8298	67.004	76.1866	41.486	33.4706	16.9852	28.6739	43.2732	19.2219	58.0723	52.984	92.1457	39.586	39.6542	78.3921	32.1253	19.062	22.0611	33.7316	33.5064	26.4753	40.9501	29.3535	41.8837	60.7971	40.8848	50.6195	34.3323	26.1935
Ruxolitinib_1507	102.974	220.95	122.181	168.482	164.417	137.455	127.555	259.164	54.2396	154.354	102.872	91.6033	154.655	183.575	179.563	104.119	205.956	104.736	138.048	91.3358	156.866	162.38	197.856	120.368	113.908	116.399	90.5034	190.2	92.7531	163.111	113.049	213.207	133.553	143.844	258.689	86.9304	88.9682	122.839	139.461	143.8	123.41	88.4878	123.189	98.9219	140.325	179.173	98.7327	61.0148	132.369
Linsitinib_1510	44.8407	66.1862	51.564	39.2301	47.7991	80.4045	30.7339	110.664	44.8284	74.7553	92.0976	61.6959	79.2575	35.1695	43.6393	27.0705	45.9217	41.4881	119.544	40.3135	43.8693	28.552	50.4537	52.9285	28.4393	59.9806	31.4849	88.8034	75.0558	53.2023	49.3645	49.9158	28.9881	67.4047	108.165	73.1188	60.2076	71.661	108.543	81.96	97.4438	52.6613	136.818	82.2698	27.1322	62.56	69.8116	50.5906	76.0425
Epirubicin_1511	0.158219	0.78867	0.579091	0.369661	0.443523	0.420638	0.341675	0.286848	0.186474	0.309551	0.4021	0.317878	0.398042	0.722502	0.334341	0.268766	0.858637	0.274081	0.393912	0.251886	0.532058	0.441572	0.846466	0.49493	0.334611	0.221024	0.242633	0.629636	0.175222	0.413581	0.435238	0.985226	0.300342	0.223125	0.793639	0.323535	0.207219	0.339262	0.365319	0.419767	0.218177	0.453039	0.446183	0.591049	0.239081	0.169085	0.428006	0.229114	0.263903
Cyclophosphamide_1512	127.78	339.981	190.781	184.191	189.855	239.817	193.027	299.124	117.012	185.166	181.827	164.375	213.259	250.274	184.067	155.306	234.549	174.646	238.681	124.166	216.095	181.535	261.764	194.031	158.87	194.52	124.624	318.721	152.242	204.587	165.529	273.166	155.203	233.881	379.292	141.674	171.192	239.583	232.975	212.001	188.806	133.692	235.457	175.201	174.626	163.815	190.839	120.289	198.856
Pevonedistat_1529	0.693651	8.90297	5.56775	1.85552	4.08551	3.12778	2.39434	1.91777	2.21059	0.935082	1.86571	1.79846	3.12322	6.71938	1.74209	1.1906	5.40156	1.43159	2.73493	0.998242	2.69328	2.90533	4.52211	2.69338	2.71064	1.54571	0.616725	6.51696	1.14851	4.34375	2.35332	13.6386	1.7107	3.57559	6.06649	1.11382	1.69624	2.86831	2.15278	3.54503	1.22326	2.15172	1.97405	4.54786	2.41318	0.913559	3.60226	3.47128	1.08239
Sapitinib_1549	31.9011	96.8841	71.9385	46.5028	68.6681	72.0182	42.0803	55.9392	21.4825	55.7025	63.2136	31.705	53.8525	112.996	75.2862	37.7911	125.085	38.144	45.9279	39.2708	83.7486	71.6353	146.758	42.7596	67.4413	42.6393	26.1758	84.8962	37.9315	81.0995	61.5329	139.835	54.5497	73.6347	71.2086	40.642	34.7222	29.4117	45.8708	35.7198	34.3416	31.6962	43.7046	40.8409	35.9452	35.3566	54.5623	32.8289	70.1656
Uprosertib_1553	10.636	31.4487	42.4838	24.3178	24.4973	34.9446	25.4753	31.8749	13.8334	29.3799	28.3329	10.3336	29.6673	42.5879	37.0519	17.1977	60.5744	19.6176	22.6368	15.1228	24.6742	35.2936	59.786	19.3849	22.5332	14.5701	18.9188	36.7593	15.6856	25.8407	24.6801	74.0828	19.5307	37.1791	31.9039	12.116	10.175	20.6595	22.3578	19.4481	16.2768	16.7038	9.26543	23.2932	16.5763	20.2908	14.6888	17.8984	15.2886
LCL161_1557	126.818	295.542	200.327	156.793	225.994	198.12	210.067	200.529	88.3922	128.127	115.968	114.059	206.954	250.141	252.041	132.272	290.637	130.384	113.326	93.7169	216.461	215.571	277.567	125.768	216.522	132.137	104.27	299.618	81.085	207.968	152.515	260.388	170.316	244.558	288.177	103.685	90.1706	121.653	143.173	120.69	99.4969	104.665	132.705	118.474	126.692	105.27	142.737	57.744	102.474
Lapatinib_1558	13.0302	35.5876	26.8815	16.2235	17.5635	37.5981	21.1541	38.0014	17.6554	28.4759	42.7788	17.8255	25.9217	28.3042	20.1593	11.0205	27.7563	18.267	47.8375	13.59	18.7907	16.0837	34.8353	28.2963	18.8019	26.1417	13.5442	55.3694	33.0646	23.6849	18.5696	39.7608	11.0084	34.0464	40.2666	37.113	28.311	21.7897	47.4163	27.2159	25.1183	23.9947	60.1091	32.2688	17.0241	18.3758	27.1604	20.082	47.3532
Luminespib_1559	0.0567278	0.126159	0.21037	0.0913925	0.190054	0.151187	0.0854912	0.0839455	0.0690311	0.112405	0.126708	0.0833135	0.123086	0.263819	0.128119	0.0873829	0.557341	0.0594677	0.205761	0.0564778	0.148334	0.146615	0.478664	0.0964511	0.113622	0.0642262	0.0622949	0.203575	0.0928877	0.124672	0.103166	0.945703	0.106277	0.0677174	0.210006	0.134672	0.0732663	0.0892853	0.0970611	0.148644	0.0742296	0.10029	0.0764692	0.117293	0.0726536	0.0568242	0.112124	0.0691587	0.0859116
Alpelisib_1560	32.694	57.2361	54.7365	39.3256	50.6291	61.9043	25.4544	88.3705	21.8363	60.3696	74.0936	22.9115	39.7548	73.0871	68.9158	40.8927	126.179	26.3164	32.6988	25.4927	54.3182	48.3128	147.453	28.87	30.9843	33.1153	39.7613	46.0274	27.017	58.4302	45.2517	150.561	41.1476	26.3218	84.0182	29.2262	17.0998	26.3569	48.842	23.0842	33.6718	21.5244	36.7156	23.0157	33.4698	41.9181	27.1478	22.2198	34.1252
Taselisib_1561	5.58939	16.5152	17.3264	7.90744	10.4098	18.0939	5.53727	15.6856	3.73568	15.9185	16.7795	4.67098	9.6724	25.3154	17.9973	6.99957	46.8164	4.82496	7.47012	4.32579	11.279	13.3802	55.2431	6.83043	6.73906	6.98546	6.96075	11.3372	6.22777	14.8017	8.60344	62.3915	7.52983	7.51112	13.7265	6.48945	3.50851	6.18726	14.6735	5.25873	7.44476	5.10417	8.42761	6.04084	5.19345	6.76749	5.37267	3.20411	9.12593
EPZ5676_1563	200.408	513.428	334.157	333.73	362.096	346.951	250.645	488.308	145.389	348.038	246.227	198.962	297.755	396.295	420.453	236.444	519.882	222.072	269.56	164.121	347.995	325.462	524.711	215.931	240.402	246.018	212.021	459.316	172.8	384.55	260.085	541.18	293.925	293.993	476.902	172.046	178.033	238.779	295.667	250.603	202.91	182.548	274.153	226.102	265.9	273.955	178.681	127.038	264.015
SCH772984_1564	8.74313	11.3745	16.6888	12.2141	18.2541	10.8404	7.1446	6.46415	6.38704	11.0546	9.79111	11.2942	11.8188	21.8605	14.5269	10.9014	30.6861	9.25675	14.3627	10.3236	21.7833	20.6008	26.842	8.74558	18.1104	6.96848	11.9639	7.84688	4.27394	21.8146	18.0013	34.5732	13.6851	8.1739	11.036	8.44005	3.53234	5.97359	6.30237	8.34379	6.58109	13.5426	12.0603	16.8402	17.9611	8.7555	8.89031	9.54232	3.69095
IWP-2_1576	11.769	29.1497	20.6853	17.3174	19.7687	19.9389	17.1508	26.9539	10.2755	18.1227	17.2841	13.5634	19.3913	22.0664	25.2263	15.0804	25.1731	14.9762	18.0242	13.0096	20.8463	18.4976	24.1816	16.5172	16.4307	13.8679	10.6064	24.9955	11.6261	20.1902	16.4123	26.5333	14.9415	20.3321	30.3733	10.7905	11.5748	16.9444	18.8578	15.3412	15.5553	13.5379	18.6278	16.2508	15.3587	14.3665	14.4555	10.0957	15.5899
Leflunomide_1578	92.2424	247.487	173.19	147.057	189.564	172.387	158.339	160.705	96.7782	118.331	136.912	116.993	177.194	205.833	147.142	118.498	210.034	127.127	169.186	122.61	169.812	170.499	184.879	167.901	171.73	135.756	101.091	226.579	111.37	185.976	150.932	232.598	134.038	185.161	229.108	101.834	129.501	156.203	163.471	176.252	166.681	123.603	159.586	140.303	164.607	108.768	156.22	129.34	118.1
Entinostat_1593	6.80691	22.9856	7.44154	9.89733	9.63195	12.3453	7.71132	28.7379	5.07382	12.1656	9.58876	7.22713	12.0509	8.84711	12.8245	6.44967	10.6706	9.4941	14.3798	6.5205	9.69404	9.62015	9.82148	9.69095	9.08116	8.63943	6.78462	23.2126	6.448	11.6899	8.4534	10.0731	8.03925	13.1439	26.1923	7.58452	6.5041	13.4652	18.1942	14.8437	9.52836	7.30747	16.3478	7.97973	6.88804	14.5475	9.64881	7.44577	10.5101
OSI-027_1594	96.2097	105.202	108.338	98.3049	105.84	108.6	102.256	94.4468	105.462	96.7677	106.796	98.8199	107.966	104.883	101.689	96.3367	102.593	98.314	100.39	100.821	106.201	102.507	101.506	102.24	108.271	101.537	97.278	114.442	105.028	106.862	108.359	106.051	97.864	113.475	103.651	99.9196	105.207	107.76	109.106	105.634	104.44	104.315	94.6402	111.158	99.6613	92.349	108.533	112.004	104.099
LGK974_1598	38.0099	88.7853	68.834	55.148	65.223	65.0321	45.0622	49.8571	37.8761	49.473	46.2109	40.9533	60.9822	70.9747	69.5653	45.7913	74.6334	45.5492	45.1911	38.2003	74.507	69.361	70.0867	52.2584	54.9446	44.8052	36.885	90.1857	37.834	71.5665	63.6599	82.8522	55.9244	69.6478	81.073	32.386	43.2718	51.369	64.4732	61.8056	43.0653	29.504	42.86	52.404	52.8614	31.2087	43.1616	46.9	53.3516
VE-822_1613	17.3946	82.2454	45.4313	33.7051	56.606	35.0556	24.4773	86.2347	8.91006	32.2337	29.2179	16.6439	36.5781	62.5864	60.1516	22.9618	87.123	16.5338	41.9261	19.6487	41.0052	44.4217	85.4199	22.7453	26.7024	24.4271	15.4621	62.9245	15.1445	46.0271	31.2187	107.773	30.2993	44.365	67.2184	11.9343	15.1924	19.0424	33.712	27.4489	25.7066	16.5653	29.2662	23.5893	47.7763	35.6946	21.189	19.4254	16.7248
WZ4003_1614	26.9181	31.6574	29.0083	31.629	32.7101	27.8536	22.5459	35.483	18.4594	39.0836	25.2657	24.3204	37.0393	41.8449	41.7871	31.2847	48.5125	26.0176	44.7631	25.8834	41.9001	42.5134	49.5581	34.6165	34.4813	22.4446	32.8541	42.0803	26.2415	45.946	32.5233	51.2844	32.1909	35.0633	51.9745	32.7251	26.692	27.4325	33.5775	51.9285	35.52	32.1497	51.049	30.2054	41.4735	25.8866	30.3492	24.8014	37.5032
CZC24832_1615	111.73	258.637	172.284	178.001	192.382	180.84	164.727	241.428	84.5213	163.274	137.172	123.491	152.984	263.178	236.752	151.403	304.021	139.102	126.248	124.938	198.564	218.041	337.102	125.995	168.175	103.185	112.65	212.811	86.4418	193.517	157.865	337.437	172.451	194.958	263.961	86.0271	101.829	120.817	160.395	151.719	121.661	94.5336	119.829	110.727	155.729	141.04	96.5182	81.3891	115.499
AZD5582_1617	2.11624	12.051	8.35344	11.9407	16.8825	9.39059	14.7913	8.00678	0.942854	5.39039	4.95996	4.74926	14.7911	24.5907	15.0356	10.4173	31.5964	3.46988	2.74736	7.32358	24.4856	23.5943	28.0358	8.32662	35.3547	2.22254	4.66743	21.8311	0.955006	15.601	16.3182	48.5271	8.17758	13.6538	24.7732	2.3985	2.04954	2.73813	4.22165	5.28605	3.86284	14.3624	1.64566	9.91791	11.7012	2.43285	15.7158	1.00118	1.30092
GSK2606414_1618	22.0301	54.8817	39.3145	43.4975	49.5488	38.5114	36.3946	43.8993	13.8505	39.5423	24.5857	27.6135	41.9194	66.9716	56.9003	30.6587	81.2571	30.3316	32.6384	24.3996	47.44	60.1721	79.0285	32.3975	45.2029	31.5236	23.3214	51.74	23.6876	60.5254	35.36	79.2991	37.8769	41.5388	58.4432	29.1303	29.3356	30.8201	32.9961	35.9103	33.8434	31.5884	38.8261	33.0905	45.7772	25.2092	27.9301	22.345	34.6371
PFI3_1620	172.347	305.406	207.04	227.294	238.838	225.452	194.663	312.605	119.315	204.397	176.096	166.094	203.738	256.024	264.461	174.974	291.812	172.345	205.441	154.21	239.752	239.456	294.59	160.524	199.844	174.101	158.357	270.507	145.488	250.956	179.394	305.017	207.58	234.566	319.86	132.017	151.3	173.514	186.557	194.084	194.787	141.111	186.595	150.55	195.487	181.557	135.823	126.573	176.039
PCI-34051_1621	81.1287	126.533	79.3326	111.87	95.3665	98.5073	119.818	189.606	45.4948	105.558	84.5458	79.5012	97.7717	100.898	112.552	82.7863	101.74	96.7235	124.554	72.1424	117.692	100.012	106.054	94.1869	85.7124	87.5569	73.2453	166.513	77.8231	92.6164	65.5583	96.9123	88.4879	134.726	212.428	74.7445	83.8571	85.0762	95.5617	111.145	92.7767	84.0098	147.847	67.7529	93.9385	113.183	70.2038	74.3908	75.5846
Wnt-C59_1622	47.7257	100.704	78.817	64.4517	76.1927	86.5908	71.1536	67.2383	43.9114	67.1726	66.9679	65.1232	86.0892	86.2197	71.0136	51.5603	86.0172	62.7254	82.6732	53.6405	85.1651	78.6284	83.07	83.3445	75.8	54.6471	52.758	138.179	59.9875	88.2374	65.2451	97.0053	53.2721	100.13	134.271	52.3607	75.354	89.3431	91.4801	79.5439	74.9818	60.0222	88.4084	82.2603	66.0582	43.3498	70.2237	62.9082	70.4006
I-BET-762_1624	15.4761	41.9478	36.1053	26.5071	38.5918	32.6125	32.302	27.4522	11.3426	30.1184	23.287	26.7101	31.55	43.178	32.9985	17.4146	52.4495	21.9165	26.8448	17.2963	36.5838	36.559	48.0279	23.6121	43.2772	25.8019	19.7593	40.6086	16.8409	37.3033	26.3965	53.3669	24.3864	31.4033	34.8271	21.9732	20.5646	22.3298	23.8074	29.2607	24.3755	21.7962	24.7048	24.7722	33.8849	20.0607	21.3811	16.9008	16.3773
RVX-208_1625	90.49	172.216	110.556	125.03	138.257	131.319	107.234	170.153	51.6455	141.086	108.332	100.125	134.294	151.197	162.887	93.181	187.168	102.41	113.982	79.1289	145.581	155.505	192.796	111.34	143.803	106.541	98.4673	143.353	83.1525	135.76	101.581	177.217	119.399	115.237	177.344	96.6703	86.3478	93.9656	131.369	124.854	96.7422	89.6594	110.655	97.9711	109.513	104.518	80.3829	58.3446	94.7184
OTX015_1626	5.50349	14.4087	12.8082	9.66355	13.6744	14.9905	11.3414	11.2991	4.52738	13.0102	12.2386	13.1624	12.7338	16.8581	15.529	7.46684	20.3264	7.85707	12.8749	7.58595	15.5179	13.6991	19.7249	10.8757	15.624	9.26843	8.1691	16.4274	6.7637	16.6108	12.2655	20.9717	8.96248	12.265	14.8722	7.32454	6.95949	9.19589	11.1116	13.1771	9.46472	10.0044	10.0309	10.4673	13.8506	6.96589	9.43196	6.97414	7.03856
GSK343_1627	13.2585	27.2911	17.3612	18.2904	19.2793	18.9293	18.2947	25.261	8.61872	16.8676	15.6611	13.8925	17.4736	24.7355	20.5135	13.8282	28.2335	14.9053	16.8366	11.9478	19.1588	19.9926	27.5566	14.2481	20.8767	13.7544	12.3142	22.7475	11.7503	19.4078	15.3574	30.6168	16.0872	20.3627	27.4136	11.6186	14.1545	14.8669	17.0189	16.384	16.4257	12.7233	14.8031	13.2483	17.6427	17.4061	13.1095	9.84946	13.131
ML323_1629	62.6014	178.366	127.774	94.7184	114.051	129.21	100.306	119.361	65.0861	92.5366	108.656	82.0854	123.497	141.575	104.14	65.4033	145.218	77.0637	116.432	70.1013	115.698	110.723	137.129	104.696	129.123	74.9798	54.2629	169.21	84.4414	113.549	94.6459	164.845	80.1601	144.331	156.231	68.2012	95.2036	96.3435	124.569	119.706	101.368	80.6602	87.9876	119.558	83.0994	56.8663	88.538	93.7459	86.4786
Entospletinib_1630	19.6655	57.7384	45.973	38.1725	48.9589	34.4705	31.7083	46.5764	12.5935	30.7993	25.8804	25.1769	40.2145	97.2824	51.459	36.1039	120.589	26.0666	28.4085	26.9806	50.8255	73.2561	115.911	27.1214	53.9585	20.2872	25.4762	38.9567	16.1073	50.0319	38.5028	143.076	37.0637	33.5257	37.9745	21.3364	22.187	17.7891	28.2085	25.5282	26.9199	24.7735	23.2048	23.1506	53.9316	20.9741	25.9599	14.2794	22.1248
PRT062607_1631	16.2543	21.2458	21.4056	19.2142	21.3362	25.0321	16.4573	35.5074	11.2954	25.3723	22.7817	20.6631	23.4403	25.0721	27.9925	18.817	33.5183	17.518	38.9433	16.2212	26.4695	24.6743	33.0018	20.0878	18.7616	19.3703	20.5484	31.4295	22.4634	27.4538	22.8583	33.436	19.8846	25.7875	43.3223	24.6087	19.4107	22.1803	30.355	31.6774	25.0441	17.4829	33.0143	19.6018	17.7511	35.7264	18.5713	16.248	26.1602
Ribociclib_1632	27.397	33.8083	26.2323	43.3708	33.2064	23.5018	26.5641	29.1143	20.1869	23.9584	21.6882	29.686	30.6213	40.1241	29.1737	37.1506	38.7972	31.0887	33.2485	31.8557	39.0895	48.9066	38.2893	30.2935	29.7452	36.0659	35.6357	29.4907	25.8074	36.7705	32.8953	42.5897	39.7885	29.0117	39.636	25.4532	29.5252	34.4135	28.4748	38.8497	41.3732	26.8168	24.4532	26.1146	45.6763	36.9389	28.1512	27.1983	27.276
AGI-6780_1634	47.5371	96.5763	60.5999	86.3935	68.8581	63.8453	72.3607	99.9751	39.5857	50.7014	48.9079	53.1623	65.9373	72.2284	65.0404	56.8935	72.5734	65.0791	73.4511	51.3014	71.0734	75.7832	75.5395	66.8299	51.8177	59.9732	43.742	89.3716	52.3126	72.2963	53.0083	74.9991	61.1851	100.005	110.577	50.3875	60.1528	63.1954	72.8728	88.9591	76.7301	38.7012	58.8133	41.4911	74.3095	55.2353	42.321	49.1443	53.797
Picolinici-acid_1635	140.296	235.467	154.494	196.327	183.948	173.404	179.004	226.438	98.3175	168.683	133.386	142.254	177.688	216.489	184.717	152.046	232.467	164.771	150.508	140.186	206.553	214.108	244.833	170.282	174.884	138.262	113.661	234.998	106.377	193.546	152.811	240.141	157.183	206.117	284.826	120.85	139.726	163.516	167.021	178.51	170.249	132.436	153.986	137.318	202.593	180.077	132.24	98.369	122.43
AZD5153_1706	2.00912	6.35453	5.0567	3.65459	5.94818	7.40002	5.7408	6.22301	2.08172	6.12902	5.09889	5.59994	5.66997	5.38542	6.04759	3.35712	5.78416	3.38982	6.35905	2.84935	6.29668	5.31135	5.66406	5.28315	6.3925	4.61001	4.38718	9.21803	3.96175	8.41637	4.81644	6.01147	3.77859	6.37839	6.86866	3.12604	4.27338	4.43605	5.69694	6.39338	4.91518	4.38143	5.60962	4.83032	6.71979	2.92627	6.25566	3.92553	3.95594
CDK9_5576_1708	0.485994	1.4628	0.705011	0.862811	1.0432	0.721606	0.60245	1.18775	0.290412	1.12713	0.496206	0.504954	0.981023	1.38578	1.21424	0.611695	1.91705	0.489152	0.756428	0.400917	1.41212	1.15253	2.32455	0.804721	0.569982	0.465748	0.654519	0.980464	0.396805	0.961056	0.565645	2.84113	0.839598	0.696769	1.27346	0.356575	0.480669	0.485932	0.523829	0.782951	0.47983	0.530854	0.556943	0.587549	0.758162	0.584237	0.666343	0.325988	0.583829
CDK9_5038_1709	0.0552556	0.215319	0.105748	0.130204	0.140169	0.105967	0.0724174	0.199234	0.0330674	0.107174	0.0631273	0.0684896	0.134182	0.207265	0.202321	0.0837909	0.315243	0.058723	0.122624	0.0573409	0.197759	0.163376	0.352215	0.120482	0.0758959	0.0577524	0.0950326	0.151607	0.0470772	0.138594	0.0864382	0.55856	0.0970119	0.0904264	0.200144	0.0389618	0.0436829	0.0832163	0.0824294	0.108749	0.0721058	0.0654784	0.0831214	0.0837119	0.0948271	0.0762433	0.129737	0.0458005	0.0839293
Eg5_9814_1712	0.031057	0.105335	0.0631881	0.0400686	0.0756428	0.0876956	0.0614523	0.0964981	0.0507172	0.0500161	0.0680932	0.0882418	0.0651375	0.0533312	0.0623336	0.0420317	0.0627642	0.0494832	0.110562	0.0371406	0.0672888	0.0511033	0.0690905	0.0526115	0.0401168	0.0279138	0.0405514	0.137198	0.0598026	0.0754237	0.0506654	0.0767196	0.0356515	0.0743052	0.113285	0.0437193	0.0299237	0.0602023	0.118712	0.0909224	0.0386604	0.0420182	0.097022	0.0682736	0.042579	0.0295938	0.0686858	0.0746351	0.0400414
ERK_2440_1713	8.13363	13.2944	17.4148	9.4709	20.1896	16.9661	9.42428	8.85535	11.0853	15.5286	15.9902	16.7953	13.8699	19.7517	17.7869	11.0393	28.5153	9.48592	9.649	13.8289	17.4872	18.1313	23.3015	12.9456	18.8614	5.55699	10.8321	12.7749	5.14187	23.6768	18.4542	38.6686	12.6047	8.41105	13.7148	11.3964	5.38767	6.55104	12.2725	10.3392	7.68862	18.1922	10.8678	20.0872	16.5821	4.44804	16.7184	11.5706	5.45127
ERK_6604_1714	17.1932	21.9614	29.2917	20.209	35.5104	24.9736	16.206	17.3933	17.306	25.3906	22.1549	33.5537	27.0697	32.8987	27.9449	25.2352	44.6545	23.2195	24.1839	25.9585	33.8403	33.2592	38.2127	27.9547	32.7848	16.464	27.197	22.854	15.1906	38.6213	34.3543	50.7306	23.5114	16.8546	30.2503	20.0968	13.8104	19.786	23.4764	28.4262	18.3794	37.9244	24.9471	32.8654	41.4091	13.3452	30.2289	25.766	12.7645
IRAK4_4710_1716	93.598	228.258	161.418	137.11	185.794	160.581	130.15	172.948	92.1308	139.875	131.605	117.616	179.406	196.064	168.703	124.294	225.59	111.441	113.457	100.773	169.757	169.984	224.271	142.971	143.668	118.386	110.75	229.354	104.501	169.799	136.498	256.215	130.345	159.178	180.627	88.8318	113.08	124.587	154.185	148.275	120.103	114.632	125.552	115.946	155.876	92.9048	129.727	94.6495	146.287
JAK1_8709_1718	35.725	95.3354	53.6279	58.1648	72.6264	63.3345	46.2774	89.7398	29.9284	70.8911	48.1253	53.9126	83.749	80.5701	76.9951	51.1478	93.8292	39.9189	56.0579	39.8152	69.9969	73.9814	100.604	66.8148	51.4213	44.7252	43.3689	98.7337	38.8769	93.8921	62.0822	104.09	54.24	66.2861	83.5523	37.8714	42.6216	42.2945	72.8265	66.1474	48.6506	52.3183	54.9633	55.6703	78.4071	42.5698	59.2407	26.868	59.5668
AZD5991_1720	78.6351	423.234	113.215	138.172	152.089	152.112	64.1845	487.391	21.9313	160.115	102.744	60.8225	160.774	181.947	262.68	52.6056	208.061	63.4657	89.7288	45.3086	145.352	93.4251	213.172	142.479	87.0562	73.076	45.9803	235.587	48.1875	189.654	76.3682	212.896	65.1299	135.754	225.016	18.6302	44.529	102.338	173.006	132.169	54.6103	53.6326	93.1232	78.5217	120.435	59.6881	56.5435	27.8159	104.158
PAK_5339_1730	7.09261	16.3046	13.267	9.99283	12.4678	11.9929	9.39416	18.0349	5.44648	10.4555	11.006	8.85629	11.9932	15.0278	13.4742	8.54862	17.0461	9.00212	13.1562	7.10682	12.6511	12.0638	16.6856	10.9783	11.121	9.63536	8.85057	19.2121	9.0552	13.049	9.23028	18.1407	8.91106	13.7979	18.7843	8.35183	8.82765	9.25295	11.9864	12.4172	11.2806	8.79625	13.5058	11.2745	9.91776	13.9229	14.0697	8.70246	11.235
TAF1_5496_1732	46.9133	113.208	44.3575	57.6554	54.4724	55.9072	45.2538	62.8683	40.9258	44.1455	43.5243	34.5063	62.7946	50.5468	50.8845	39.6233	44.8227	51.727	38.1215	44.4489	54.0942	52.5302	40.7633	59.7863	39.9896	50.9275	41.0722	91.8646	44.7059	60.1879	54.6742	52.1641	53.709	70.7664	70.736	32.09	57.2956	72.6116	69.6726	71.3703	55.786	23.5479	47.548	43.2554	47.5973	29.7093	27.9705	58.921	63.8079
ULK1_4989_1733	5.05814	19.3975	16.0032	11.1902	17.178	11.9116	15.0426	10.8658	5.12911	4.79548	7.76378	7.16516	11.3239	23.5531	15.5677	7.89294	26.3771	6.1266	5.08097	8.67777	16.8222	15.5661	23.3549	13.8564	14.7556	4.32093	6.19798	22.3027	3.21489	13.6	14.4733	32.3885	9.44951	15.656	20.7764	4.18768	3.24654	10.312	8.17994	7.62709	4.24702	7.08905	5.82769	9.16189	15.9807	5.70517	18.9637	6.48225	6.09188
VSP34_8731_1734	5.77296	14.8474	10.398	12.6164	13.0992	9.20803	11.8384	12.0925	5.12053	8.46944	7.93549	5.92192	12.4436	16.0001	12.6274	8.93443	17.6282	6.1054	9.63521	8.07101	16.921	16.0536	18.9978	9.94962	12.3178	6.01386	7.5858	14.5371	4.27983	13.9298	11.4952	24.097	11.9913	13.7157	14.5099	5.18769	6.07382	5.8895	5.98853	10.8591	5.83591	7.93758	8.03081	9.15781	14.817	6.98341	12.1717	5.68647	5.73146
Selumetinib_1736	29.6512	43.9744	47.7326	57.5833	64.1225	43.4401	31.4289	45.1663	17.6093	51.7259	40.8459	49.5347	48.6935	80.7491	65.7643	51.3107	116.156	46.8273	36.5636	48.8369	72.9248	83.9781	115.209	46.2786	65.4004	23.8915	44.2782	34.6397	14.1581	98.9094	87.4117	137.78	56.9754	31.8514	65.5019	33.1415	10.5127	19.8987	27.6501	31.5602	22.2579	42.7798	47.3234	50.2633	112.675	55.0078	38.0041	28.8217	13.8188
IGF1R_3801_1738	5.01502	8.40826	6.0636	3.80782	8.57354	11.701	7.30616	16.092	5.89207	11.7492	13.1989	5.13877	6.04447	8.68879	9.47154	5.52976	15.9916	6.96433	5.97136	5.09815	6.19332	6.06524	17.071	7.13202	3.81387	4.37299	4.41057	10.9997	5.20824	6.92153	5.00316	22.4499	4.10335	6.80037	20.7644	5.96579	3.19239	4.11243	10.7811	7.09853	5.33321	7.16495	6.8303	6.25013	4.86619	7.49714	7.70284	5.94653	5.49807
JAK_8517_1739	20.1821	30.6662	13.3118	21.6908	27.0568	20.4337	18.6569	61.5323	11.4223	31.5237	20.6333	14.9909	17.4148	24.7243	35.8817	25.0145	37.2316	18.308	14.6929	19.5746	24.9245	27.6214	41.9406	18.2446	10.3364	10.0653	17.2911	28.773	10.9015	29.5392	20.7686	43.5436	21.3732	15.2065	59.8974	11.6329	7.04885	11.8403	20.4489	15.8159	11.3019	14.5796	17.259	13.1803	20.6946	24.1416	17.6356	12.1019	15.9817
AZD4547_1786	15.8007	32.5177	22.1125	21.9495	20.036	15.4361	18.3402	19.6425	15.0479	15.947	13.9708	11.361	21.9977	26.2815	14.0938	16.4372	28.9473	22.5255	10.7007	14.6819	22.9098	22.2897	31.0302	18.0392	13.1296	14.4971	14.3654	32.7867	11.1588	23.7078	18.4016	36.0195	12.5315	22.8889	31.9671	9.82095	8.25804	12.7774	24.8015	23.9487	14.6552	14.7279	9.6372	20.3192	26.8246	18.8384	20.1916	14.9767	9.72974
Ibrutinib_1799	63.2367	189.478	105.083	112.731	114.704	113.573	65.3466	163.523	33.3284	106.006	99.1795	48.3993	98.3257	153.327	126.887	50.2143	184.03	61.9205	107.166	49.8027	134.652	122.857	171.259	80.7452	74.9501	119.49	59.0216	242.206	74.2463	140.571	70.026	186.791	78.9045	183.066	195.835	56.8994	65.9336	67.5196	81.1572	85.6398	88.5074	52.9753	113.025	59.1924	109.19	93.3792	91.9399	53.1083	147.784
Zoledronate_1802	35.8252	75.8151	41.5222	50.365	49.9078	53.2966	47.565	112.245	26.7564	53.9584	44.6977	36.8032	51.1795	51.1159	59.1843	40.3248	62.4654	41.6308	50.4477	33.9609	52.023	44.1355	65.9332	52.469	36.9877	40.5475	41.0198	69.5657	36.9301	56.6877	38.9222	64.3401	40.7839	63.4105	89.8152	30.6381	35.6218	44.0168	51.424	50.3136	39.2142	32.7259	59.1356	34.1059	44.7566	47.5112	39.3261	30.1593	47.2161
Acetalax_1804	87.3889	154.131	93.6673	215.273	131.019	144.332	102.343	289.92	49.5188	139.257	170.173	59.374	154.937	126.186	260.281	96.2692	128.467	87.4045	202.506	90.5913	149.187	86.8452	124.256	136.825	76.4924	119.306	99.5335	187.484	86.6867	215.412	136.088	150.31	111.145	206.798	132.552	81.2623	76.9186	95.9915	141.822	98.8148	74.522	106.822	58.7123	98.6655	179.681	114.757	121.818	160.035	85.4791
Oxaliplatin_1806	83.2808	292.753	170.722	170.125	190.905	180.134	189.071	211.537	62.4456	129.296	114.006	95.3487	205.055	211.378	164.619	92.6807	287.839	132.426	156.898	119.686	224.517	176.1	285.767	171.884	165.874	78.8229	91.0234	341.336	73.7801	211.364	163.393	317.4	132.075	245.272	303.31	102.54	85.1628	112.066	184.873	212.273	77.641	130.089	123.188	210.064	127.911	145.986	146.69	160.83	78.1052
Carmustine_1807	493.273	986.339	606.347	599.127	629.272	729.384	563.705	1239.03	301.477	743.374	585.578	397.902	655.398	662.756	756.116	474.809	842.595	480.218	589.76	365.781	646.913	521.983	835.072	523.426	410.869	452.646	493.742	855.065	450.762	581.648	451.418	794.806	474.131	652.518	932.721	329.282	405.274	478.771	683.353	540.636	408.393	382.201	621.68	432.673	432.559	649.423	404.01	348.625	546.148
Topotecan_1808	0.384525	2.47634	1.11573	0.730736	1.6503	0.980046	1.24428	0.871718	0.470142	0.535595	0.667812	0.518749	1.03998	2.20464	0.727875	0.862305	2.61067	0.736383	0.60916	0.615617	1.59317	2.03292	2.40762	1.07727	0.88896	0.676759	0.507535	2.16832	0.323542	1.24475	1.22182	3.99707	1.22455	0.828763	2.07544	0.503951	0.572458	0.685811	0.706532	0.939884	0.655453	0.815177	1.13892	1.24158	1.2654	0.453268	1.16208	0.91971	0.38751
Teniposide_1809	0.653075	5.68402	1.80425	1.50495	3.66928	1.85861	1.93019	1.25111	0.626288	0.90828	1.19117	0.708838	1.68289	4.08842	1.80035	1.30165	5.58972	1.0536	0.85259	1.02584	3.40722	3.4019	4.45419	1.88045	1.19295	0.622428	0.927821	5.25956	0.445284	2.20324	1.63632	7.43063	1.64789	1.30013	3.90744	0.75824	0.636731	1.06984	1.92784	1.61312	0.782227	1.28011	1.43951	1.71675	1.34975	0.487948	1.98551	1.32065	0.490947
Mitoxantrone_1810	0.841598	6.25246	2.38917	1.62052	3.54951	2.0299	2.37495	2.57574	0.575026	1.28164	1.27347	1.19126	1.97323	4.22921	2.20264	1.37447	5.72675	1.37933	1.3741	0.986687	2.86926	3.43893	5.22889	1.73804	1.41937	1.29556	1.19115	4.44513	0.581499	2.40706	1.61261	7.10701	2.32039	1.51078	3.1678	0.94667	0.703601	1.14625	2.27205	1.95772	1.00113	1.2682	1.53399	1.34681	1.65934	1.59681	1.45921	1.32655	0.532
Dactinomycin_1811	0.0537329	0.174802	0.156814	0.099133	0.139484	0.118546	0.143793	0.118707	0.0517268	0.0988228	0.0896374	0.0816559	0.114249	0.165521	0.0950688	0.0692437	0.239714	0.0653211	0.0897646	0.0706036	0.131581	0.127006	0.230402	0.0926567	0.104954	0.0724849	0.0686758	0.155792	0.0483238	0.105572	0.106217	0.291968	0.0825138	0.102062	0.128568	0.0752497	0.0552212	0.0725315	0.111466	0.0900744	0.057082	0.0969563	0.0820007	0.121561	0.0889603	0.0523769	0.0885472	0.0717513	0.0553119
Fludarabine_1813	87.933	365.314	201.276	225.998	209.789	171.109	135.365	227.539	33.912	186.547	103.467	122.846	217.994	291.205	209.049	123.451	331.14	106.679	183.172	91.2823	199.238	217.879	310.252	157.647	198.945	125.653	106.489	226.709	87.9495	213.219	88.9731	333.526	125.181	127.492	263.613	98.934	100.36	117.861	175.53	185.135	151.098	110.065	194.195	126.708	216.627	149.476	173.043	60.7415	119.982
Nelarabine_1814	370.779	942.133	433.289	573.405	536.531	640.314	435.057	1133.89	180.976	735.646	515.099	373.833	513.01	633.063	694.091	424.857	752.67	378.123	502.073	336.702	588.593	498.551	806.883	441.004	324.807	419.411	378.742	735.461	353.037	523.28	368.479	769.957	446.146	489.422	881.946	280.921	288.985	333.001	587.059	453.36	435.128	303.428	472.847	291.833	412.472	556.319	342.008	209.044	514.935
Fulvestrant_1816	70.6375	174.909	120.754	106.661	124.221	140.85	102.865	185.542	64.3453	114.016	124.119	99.7191	118.043	125.265	140.389	88.8678	130.925	86.1549	115.097	78.7465	114.004	92.7831	126.557	103.524	73.4359	94.8343	86.9449	145.099	92.708	133.693	99.8811	149.237	80.2758	136.721	180.427	69.5339	79.5653	113.894	169.828	123.761	125.099	79.6202	105.053	89.1174	96.399	72.364	92.5794	92.5554	104.985
Vincristine_1818	0.083175	1.31794	0.378435	0.133099	0.37225	0.522455	0.242559	0.938765	0.0480082	0.253417	0.23094	0.177334	0.250337	0.733513	0.503602	0.147393	1.55406	0.163477	0.377904	0.064051	0.263275	0.295244	1.37169	0.259889	0.149472	0.11024	0.116686	0.596803	0.10932	0.298784	0.142094	1.76459	0.13314	0.235784	0.811299	0.0974782	0.0876964	0.247222	0.468862	0.32775	0.198511	0.119392	0.388018	0.111803	0.22357	0.11809	0.150901	0.0905039	0.229321
Docetaxel_1819	0.0372562	0.751241	0.29113	0.0493122	0.314593	0.251763	0.213834	0.168277	0.0367477	0.060517	0.117603	0.13163	0.13982	0.625602	0.161813	0.0715709	1.2828	0.1052	0.120465	0.0367373	0.180185	0.255474	1.20114	0.113033	0.101767	0.0556446	0.0444448	0.358812	0.0447399	0.217501	0.100752	2.30174	0.0620583	0.163472	0.464922	0.062024	0.0412341	0.0609447	0.234015	0.190481	0.0880593	0.0759356	0.152647	0.077513	0.202291	0.0193323	0.108498	0.0618278	0.0476171
Podophyllotoxin bromide_1825	0.382203	1.69897	0.68569	0.437529	0.784223	0.837126	0.740604	1.22864	0.281577	0.736781	0.541421	0.523984	0.74646	1.02635	0.805434	0.490918	1.50208	0.578892	0.792777	0.330718	0.76307	0.649024	1.38143	0.756697	0.505622	0.413857	0.3459	1.41312	0.372124	0.737065	0.406076	1.42251	0.410936	0.736742	1.60072	0.470723	0.404391	0.544336	1.0865	0.905077	0.584454	0.502367	0.79635	0.476296	0.657748	0.354342	0.601412	0.377649	0.529804
Dihydrorotenone_1827	2.1202	5.22421	3.4514	2.37004	3.52316	3.95623	2.73737	2.74258	2.86725	2.62084	3.48357	2.00789	3.83205	3.76509	2.57115	2.12834	3.62981	2.57514	2.55225	2.36906	3.45081	2.8611	3.16069	3.08452	2.58542	2.5588	1.98243	5.00877	2.37416	3.21265	3.03513	4.62295	2.32933	3.751	3.96134	2.19978	2.90547	3.65354	4.36052	3.1679	3.23926	2.033	2.22922	3.34384	2.10732	1.09769	3.11755	3.34009	3.10744
Gallibiscoquinazole_1830	13.8777	27.7919	18.1789	17.4605	22.5557	19.4762	16.2659	25.7134	9.46364	17.7028	13.2673	14.0405	18.3079	21.2855	19.3895	15.1441	25.3686	15.9353	13.4444	11.3572	18.4163	16.909	23.5937	17.2311	13.8152	13.0451	15.9407	23.5839	10.6501	18.3299	12.718	25.7126	13.7627	13.6186	30.9712	9.7433	10.9179	13.1572	20.9658	15.6576	13.859	12.2427	13.0836	12.8679	14.8955	10.2891	18.2336	11.2719	13.7233
Elephantin_1835	21.1203	72.5525	57.8391	27.7401	57.0895	76.4995	34.477	64.5852	21.337	50.0707	48.9038	29.1367	59.6697	54.8723	48.6302	24.3398	80.393	28.3205	58.3166	26.3422	50.8743	35.9772	65.1417	59.268	39.611	20.5283	26.3369	94.7811	24.4145	54.7253	38.7627	86.4762	23.9585	51.565	67.8595	23.6408	27.2693	37.2875	70.4305	44.2009	29.0364	49.8894	35.712	59.4309	19.9791	23.5645	60.3627	35.2323	38.2243
Sinularin_1838	32.1204	67.3878	53.494	36.1038	46.8484	72.7154	41.9576	83.2582	25.788	63.935	61.6139	35.3952	56.3114	50.5139	61.5607	29.2582	62.6368	30.2569	62.6304	24.0083	49.0211	40.1372	63.5341	40.2947	38.1454	36.2612	35.9372	88.3488	35.4878	50.6256	35.1732	64.3836	30.0315	56.4664	50.8361	31.0693	35.9996	34.4577	63.0102	40.4927	33.0196	34.0275	47.0809	40.5268	32.3016	36.1965	42.3701	28.1546	53.3784
Sabutoclax_1849	0.669517	1.71755	1.20449	0.931559	1.2165	1.11708	1.04712	1.37838	0.695555	0.750219	0.80697	0.498305	0.931561	1.24887	0.913249	0.797666	1.63187	0.811631	0.750538	0.730615	1.06853	0.827197	1.37553	0.829849	0.673024	0.557104	0.54547	1.11523	0.595732	0.747459	0.797125	1.88153	0.763346	0.733027	1.63142	0.468328	0.534348	1.03034	0.916511	0.974972	0.640992	0.703842	0.562753	0.688969	0.613047	0.663457	0.70397	1.03359	0.684407
LY2109761_1852	174.494	288.12	170.859	167.308	181.1	225.245	158.884	402.117	100.196	236.946	195.236	145.228	187.575	171.103	265.897	141.918	215.645	150.157	220.302	106.298	162.342	155.359	226.498	178.429	114.309	223.086	177.534	372.253	215.164	212.786	130.114	214.876	161.74	198.641	353.426	130.995	185.286	197.389	203.884	219.616	188.191	110.054	252.07	128.249	182.617	374.462	130.14	119.827	259.024
OF-1_1853	54.7404	131.547	66.404	76.836	76.1208	74.6097	70.3766	79.3137	45.2262	65.359	53.0293	52.18	88.8251	80.1923	71.7034	50.5725	75.2259	59.8342	62.1921	46.0878	73.0213	73.845	73.4683	80.0184	59.4535	81.9049	43.6561	139.959	58.0155	79.4424	52.3411	89.5353	64.1866	99.221	103.935	46.3761	78.5652	77.4123	81.7219	105.19	85.346	39.5953	56.9715	53.7351	72.2279	43.6201	53.5902	48.2572	66.6862
MN-64_1854	107.414	237.09	116.763	143.754	139.84	133.839	96.5716	338.768	67.8369	149.583	116.053	78.6414	125.219	135.796	201.232	100.412	146.266	100.589	114.746	83.8812	154.458	133.708	152.29	119.192	97.6344	127.425	100.544	208.744	95.6459	155.991	103.137	158.13	120.409	149.423	199.505	70.316	82.7739	97.2483	136.672	127.99	110.543	78.6832	118.809	79.0073	119.662	128.221	85.3017	71.2107	135.348
KRAS (G12C) Inhibitor-12_1855	60.6919	279.741	120.633	122.693	140	126.945	109.365	222.104	63.6067	77.8734	86.6921	48.1829	95.0628	167.23	104.73	79.4697	212.389	76.9152	112.079	56.3026	140.068	121.248	186.215	107.275	64.3009	81.2393	53.9628	264.112	70.6631	112.802	76.2988	245.643	79.5799	139.764	291.802	47.001	75.0583	94.3095	105.134	133.181	76.9828	46.9777	88.8619	75.2363	110.954	103.789	90.5077	92.1299	70.4956
MG-132_1862	0.207688	0.259535	0.228306	0.21319	0.25856	0.228316	0.22312	0.22657	0.146346	0.242161	0.218684	0.189475	0.184515	0.277463	0.263841	0.222851	0.260874	0.214031	0.19762	0.196794	0.242384	0.241285	0.258393	0.221117	0.231521	0.164523	0.207722	0.209627	0.155759	0.213173	0.220703	0.267863	0.199995	0.183674	0.26115	0.1726	0.178132	0.186595	0.233163	0.187071	0.169253	0.208914	0.164155	0.209595	0.184499	0.171637	0.191314	0.141034	0.162758
BDP-00009066_1866	6.75854	15.7488	12.8687	10.7152	13.5647	11.1637	11.043	14.6107	5.51232	12.2459	9.64859	10.1233	14.8919	19.3791	10	8.35457	22.5804	6.98786	11.5502	7.36381	14.0786	12.722	25.5134	11.755	10.2562	8.62436	7.45163	11.6996	6.70135	12.7433	10.7408	29.8398	10.3834	10.8348	12.9084	9.4064	9.73495	9.07656	8.40364	12.3273	9.38369	11.2745	9.16559	11.7169	13.89	8.7025	11.4152	6.13733	8.79145
Buparlisib_1873	1.87586	4.899	4.26298	2.30133	3.42476	3.53151	2.68981	2.82554	2.11489	3.12118	3.18715	2.46743	3.69077	5.15708	2.62374	2.55714	7.82706	2.16386	2.51154	1.77828	3.33149	3.58506	7.54526	3.11008	3.21414	2.40247	2.15828	3.56991	1.95355	3.23771	2.68711	8.97208	2.26007	2.35061	3.54387	2.76481	2.18469	2.32708	3.76514	3.08052	2.41164	2.5258	2.55365	2.81515	2.53339	1.86199	2.96501	1.94825	2.18826
Ulixertinib_1908	10.8532	18.0176	22.4742	16.1188	16.9808	16.8166	11.6088	11.9544	11.9133	16.6822	18.0605	21.9076	18.2401	24.2082	12.9121	10.9969	29.6035	11.8745	32.0119	11.6549	15.8474	17.2768	27.3325	16.4269	18.3309	17.0045	13.5742	17.4931	15.728	21.7584	16.0342	33.4011	12.4638	13.0752	15.7851	17.1166	13.3259	15.8125	12.5382	21.7179	16.0783	17.1926	22.2449	22.6796	20.2572	14.5739	12.9451	21.9831	9.69899
Venetoclax_1909	6.65962	19.8832	11.8406	9.40047	11.9747	12.3223	8.81479	11.2811	5.85553	8.49518	7.95114	8.97288	11.9625	15.1579	11.2663	7.06889	15.5577	8.87387	10.7214	5.74575	11.3088	12.7456	16.7433	7.88842	10.538	8.24463	6.06216	17.7953	7.32237	12.3524	7.51533	17.7663	8.03904	10.9893	20.7504	4.9166	6.26307	12.2205	14.1183	10.7918	6.8232	6.18595	10.518	12.4157	7.17673	7.52613	11.1903	6.6622	6.93455
ABT737_1910	13.7334	18.6909	6.35996	14.2279	7.46021	12.396	5.92676	47.7486	4.42395	17.3149	13.425	7.53605	8.79174	8.17182	20.9022	10.0163	7.74396	14.2875	15.5246	7.21505	7.1544	7.54612	10.0358	8.64104	6.71193	11.6447	7.89964	12.6649	10.0562	10.3557	6.37989	6.93657	8.55325	14.86	27.7175	5.17985	5.88506	20.7684	12.5521	8.36225	9.87053	4.77532	13.8296	8.67529	9.86618	34.5903	2.70148	6.79635	13.0225
Dactinomycin_1911	0.00367299	0.0270041	0.0212036	0.00867458	0.0123123	0.0128799	0.0115844	0.00622039	0.00650878	0.00784704	0.0104521	0.0101806	0.0136035	0.0243055	0.00685584	0.00584343	0.0279104	0.00706311	0.0121699	0.00530353	0.0134461	0.00970243	0.0284042	0.0122119	0.0105709	0.00503834	0.00426531	0.0221389	0.00458934	0.0110018	0.00882748	0.041904	0.00640158	0.00993995	0.0229872	0.00801501	0.00511739	0.00891455	0.010504	0.0130074	0.00697462	0.0119366	0.00791887	0.0188193	0.00592043	0.00351257	0.0129051	0.00623769	0.00623046
Afuresertib_1912	7.45202	27.0436	25.9131	20.1987	13.3837	19.0502	15.3362	19.5426	8.65912	15.6049	14.4352	10.4462	18.9134	24.1332	19.1254	10.2031	25.8343	10.762	14.9568	9.22532	12.5449	17.5908	29.2298	15.3318	15.0599	13.178	9.84054	22.02	10.7174	14.7171	12.4213	32.9258	9.0144	16.7297	21.3508	11.3084	8.70982	19.7316	18.3666	13.1852	11.112	9.7975	9.6447	15.9354	14.1344	12.9699	11.8134	9.55925	11.2968
AGI-5198_1913	75.2207	153.368	103.713	114.439	98.7431	92.7186	87.0586	104.618	78.6685	78.7653	78.1709	95.4002	106.797	114.201	100.958	85.9185	115.232	93.1698	95.9028	77.0669	110.525	117.026	114.326	112.421	77.2469	99.7452	79.4189	153.867	83.0231	112.984	89.328	128.518	96.3816	109.574	129.267	80.8597	86.4006	95.6458	128.896	135.169	87.6406	69.8577	97.2969	98.5388	98.2987	83.826	112.533	88.9349	110.781
AZD3759_1915	11.5564	30.5318	18.484	18.7313	19.6519	19.0381	17.1588	22.5642	8.03578	15.0495	12.0708	14.1127	16.1891	23.388	20.5383	13.1597	23.5781	15.0967	13.7367	10.1957	18.3466	17.2891	26.5336	16.382	12.439	20.9057	10.7181	24.6893	14.4801	17.8409	10.8689	22.159	15.4476	24.3472	25.5341	11.7487	13.1872	13.5167	16.7023	16.4025	16.4436	9.16515	16.5796	10.0023	17.7718	14.3233	10.8688	8.91998	17.3195
AZD5363_1916	9.0444	31.7157	36.0543	25.1298	21.1359	24.2898	19.4535	18.9765	11.112	21.202	16.9585	13.2832	23.2534	43.982	27.2064	15.5387	55.8796	12.8551	13.7799	13.0521	20.4273	30.5868	60.1052	18.5145	21.9275	14.6004	15.2044	31.201	10.4754	24.4258	20.7886	67.0482	15.1706	17.6874	30.5229	13.1035	8.67047	22.0509	22.5287	17.81	12.1255	15.5831	11.9311	24.3009	20.9484	13.156	17.7302	10.7853	16.2267
AZD6738_1917	3.20803	25.0449	10.1774	9.71892	13.1878	9.86164	6.23329	12.8699	3.73437	8.33511	7.93422	3.97335	13.4864	20.0671	9.33242	6.91982	25.322	4.6135	11.2113	5.56917	11.4211	10.5084	28.4307	7.7526	7.02207	4.05294	4.13024	14.5576	3.48319	9.74106	8.25402	42.6638	7.55187	7.55932	25.639	4.604	3.53627	5.3952	12.5853	9.77895	5.7019	8.18666	7.37033	11.2173	9.51788	4.52023	12.1864	4.26428	5.3987
AZD8186_1918	13.5669	31.439	27.8287	27.2542	25.1615	24.3878	23.1154	21.0595	8.99625	25.325	16.1061	11.7422	24.2524	45.3582	28.885	25.033	54.9479	16.5237	17.3375	13.3361	24.778	40.1324	62.5479	16.9923	24.2075	24.3869	20.2464	30.7132	15.2643	28.8862	22.4141	64.5162	28.8408	20.0166	27.9772	21.9823	16.8914	15.6365	24.0204	23.8412	14.8778	12.617	16.0283	17.6555	25.9764	26.3716	15.1442	9.17994	21.9125
Osimertinib_1919	4.51434	10.4431	7.68421	5.71061	6.13838	10.2101	6.06035	10.4956	4.1382	7.80175	8.63618	5.24549	6.68545	8.67286	7.67	4.03195	9.67408	4.92862	8.29406	3.33327	6.61183	5.83454	11.4416	6.22128	5.01787	7.50158	3.90044	13.9077	7.56188	6.81589	4.44232	11.5548	4.2871	9.19293	11.6248	5.46297	5.77759	5.59646	7.73314	6.10705	6.0738	4.02974	10.3013	6.00051	3.90093	9.46658	7.27665	5.35287	12.1818
Cediranib_1922	6.60829	13.4887	11.9144	10.5005	10.6375	9.29024	6.91297	11.0326	4.64128	10.7404	8.16912	7.60187	8.56843	16.0584	12.8894	7.28464	20.0383	6.87977	10.0429	8.09826	9.04593	10.695	21.0216	9.59217	7.40923	6.91239	5.75338	11.617	6.68525	10.6108	7.03573	22.6123	7.059	7.6039	15.211	8.31604	5.32917	6.67676	10.0127	6.9388	7.85721	6.86878	9.57966	7.00308	10.2718	8.56572	8.728	5.84895	7.67246
Ipatasertib_1924	18.7603	66.037	62.8077	44.692	37.9209	53.6426	41.1517	56.7376	25.742	37.4548	42.5722	20.4839	48.7218	58.7727	45.8191	29.2296	67.0552	27.1421	39.2443	24.7225	34.7529	41.2671	76.99	40.0723	34.1799	30.6303	25.2991	61.2766	27.3324	41.648	39.6212	82.221	24.8452	51.0332	57.0534	24.843	21.5853	47.5615	46.1112	34.1904	24.7744	24.5635	28.4188	44.7799	29.284	34.126	29.4997	22.7329	37.5605
GDC0810_1925	108.914	217.518	180.636	139.032	158.064	165.578	161.074	152.287	110.823	115.45	140.199	115.124	170.37	205.071	127.482	119.352	205.47	129.698	187.115	105.631	178.604	166.774	216.118	157.447	144.441	152.877	96.7639	246.584	139.466	158.563	129.576	237.672	116.84	184.725	250.586	127.454	148.104	173.158	180.083	185.649	152.91	108.9	149.372	158.212	131.943	79.9842	156.666	113.041	136.378
GNE-317_1926	1.00322	2.15902	2.27325	1.43477	1.91821	1.94131	1.91395	1.26575	1.27068	1.64908	1.66074	1.32713	2.1013	2.68962	1.27337	1.57399	3.25637	1.33572	1.83576	1.26104	1.94167	2.11406	3.19295	1.677	2.26411	1.66872	1.42246	2.03667	1.40235	1.78823	1.5734	3.76387	1.39004	1.71252	1.8473	1.86456	1.70405	1.58612	1.89698	2.01143	1.94059	1.83045	1.49082	1.75048	1.53872	1.04759	1.73883	1.20439	1.3563
GSK2578215A_1927	117.804	227.147	129.794	157.509	157.481	164.578	124.582	207.543	107.353	130.249	138.313	115.443	156.806	161.195	157.717	109.379	159.334	125.883	199.182	110.071	161.053	150.285	166.926	174.335	127.361	132.072	102.229	244.96	122.481	160.86	122.411	170.492	107.043	163.729	275.972	108.785	126.294	187.28	210.464	165.118	143.906	120.738	189.965	155.158	110.679	91.8807	162.164	96.6228	161.515
I-BRD9_1928	48.1135	156.364	91.8507	70.2079	80.6156	117.559	81.5195	135.881	52.5925	100.534	100.898	89.0695	112.234	91.8042	92.9311	50.7426	94.0666	62.6421	151.795	55.1967	108.116	66.8313	108.324	113.341	81.9399	84.4462	53.2547	178.403	81.2255	97.5314	81.7762	96.4443	55.6976	127.272	160.346	91.356	84.2042	114.34	138.306	118.243	92.432	80.5984	150.491	116.95	64.6363	81.7128	110.297	59.3592	110.36
Telomerase Inhibitor IX_1930	1.22162	3.56302	2.7635	2.4417	2.66706	2.38053	1.8184	2.80601	1.51287	1.85075	2.06511	1.55632	2.0568	3.25595	2.11441	1.64617	3.72614	1.83954	2.8438	1.77228	2.07346	1.85188	3.34485	2.51446	1.86428	1.203	1.06538	3.10708	1.32722	2.48798	1.70639	4.87486	1.52086	1.94164	3.94038	1.45323	1.26159	1.91384	2.45623	2.32067	1.68625	1.76922	1.88003	2.22883	1.66899	1.10404	2.33979	1.68431	1.35552
MIRA-1_1931	149.655	488.971	305.898	251.95	322.908	438.842	210.129	524.325	155.942	366.165	411.905	189.03	341.206	350.313	360.758	197.303	400.068	191.814	413.804	178.558	310.039	229.504	400.987	296.713	183.195	180.765	187.794	502.483	220.945	330.727	285.278	456.654	191.089	277.979	544.692	166.404	183.605	266.359	440.986	266.31	222.577	187.676	379.869	250.693	203.71	202.16	301	180.564	296.327
NVP-ADW742_1932	13.1258	18.8111	14.8606	9.47977	12.3051	20.3694	10.1121	27.2471	14.8112	34.8254	28.5315	22.0085	29.5768	10.7341	16.0494	8.97722	14.7868	11.514	41.6976	11.7242	12.0478	8.8285	15.3344	22.3018	12.5694	13.9387	12.6332	29.67	25.0141	17.3315	14.7425	15.126	8.68243	17.5995	39.5417	39.3469	21.1128	27.7309	41.252	31.3857	36.626	29.2023	70.5844	30.9608	11.8142	20.8122	23.5153	12.7622	31.944
P22077_1933	77.5257	282.263	173.202	98.1135	140.689	149.142	98.7206	184.386	85.4973	107.436	118.435	72.6816	159.146	169.868	130.278	66.1335	189.833	83.9287	134.884	52.544	116.445	115	183.08	117.585	102.919	95.0791	62.8378	247.233	73.5928	147.374	84.772	201.952	72.484	132.206	220.56	71.0485	85.8848	134.765	141.249	115.599	97.3159	99.2362	120.191	154.704	83.0888	73.1936	115.361	90.2211	93.2586
Savolitinib_1936	11.0816	32.1274	23.9768	20.8877	18.4285	18.0406	18.3379	23.4748	10.9275	15.5634	14.115	13.3065	16.3436	26.7499	19.6907	13.3869	26.0445	13.9301	14.7954	10.6716	17.0311	19.8382	25.024	12.6217	22.7969	13.7956	10.0376	18.5748	10.6683	17.5152	15.7042	31.4737	14.2379	16.0061	22.0747	9.45208	9.9043	14.525	15.0006	16.0195	12.9656	10.2783	8.56169	13.3994	15.947	15.2698	10.7862	9.67951	8.98543
UMI-77_1939	23.6972	29.8274	20.5821	25.1218	22.3035	29.95	15.2994	74.144	12.0992	42.6446	33.4009	26.8144	21.4463	16.4103	43.7376	18.68	18.9495	17.7085	33.3316	16.9457	17.9837	13.1496	18.4818	23.064	15.5372	15.9163	24.0045	31.8635	21.9227	21.4993	14.2437	17.1738	18.2116	14.9661	48.4828	15.6723	14.1492	19.2676	24.0468	18.5936	17.0731	21.3335	33.3377	22.3215	12.215	21.3445	19.3983	12.9616	21.5331
WIKI4_1940	29.1843	67.6535	52.4039	41.6615	51.0196	45.6336	35.1076	53.9197	27.166	44.1701	47.6724	37.2868	38.8496	64.3867	59.4	38.0116	70.6882	35.6813	34.0044	33.4777	47.6797	52.8233	75.4054	46.3613	46.1063	31.6799	35.1978	44.6417	29.7749	49.6673	40.2591	81.1934	43.5247	30.5955	51.0193	31.0296	28.4727	33.7141	42.1238	35.9139	34.2792	30.4797	36.7549	38.5589	38.158	47.1743	43.5808	28.5316	40.1887
Sepantronium bromide_1941	0.0162836	0.0426283	0.057352	0.0169077	0.0410101	0.044948	0.0255298	0.0311098	0.0235984	0.0162789	0.0364359	0.0354141	0.0184069	0.0466982	0.0409029	0.0156923	0.0550622	0.0201836	0.0180861	0.0192934	0.0214456	0.0217315	0.0358277	0.0217103	0.0348037	0.0116516	0.0174842	0.0216724	0.0108889	0.0328213	0.032092	0.048986	0.0170132	0.0195924	0.0223072	0.00928625	0.0116238	0.0261066	0.0131361	0.00952388	0.0115768	0.0314714	0.0164939	0.0295158	0.0111988	0.00811546	0.0354171	0.0204278	0.0123496
MIM1_1996	45.272	114.807	72.1351	67.5079	60.4923	58.6821	59.0675	101.191	33.3709	46.4988	51.3176	53.3534	64.7837	86.1417	69.1287	47.1476	82.1512	47.3823	61.9321	43.2574	62.9535	61.5297	87.436	56.5162	52.0475	39.952	45.415	75.6466	36.0764	63.0034	51.9741	99.0859	42.0258	56.9532	96.1031	37.2719	35.5397	48.4815	53.8278	53.6553	42.1179	44.6626	54.0228	59.7575	53.9235	52.6858	57.4582	45.3845	38.526
WEHI-539_1997	58.5985	50.8481	25.5849	34.0301	33.6934	44.1489	36.7701	85.9222	32.7021	54.3439	55.0056	23.4611	34.5776	27.3806	46.1914	41.3479	27.2353	47.5707	35.3513	32.958	37.4796	35.208	28.6222	36.3297	24.2621	43.8992	40.9799	64.1763	39.6244	30.6038	33.9133	26.7762	34.0642	65.411	77.3309	30.7844	33.0149	46.7138	51.3122	31.8136	38.5844	29.5175	36.7986	42.9063	38.5509	40.6668	29.5964	37.8452	55.4143
BPD-00008900_1998	58.8015	122.15	102.163	82.6083	105.878	125.147	83.4865	111.353	46.9156	115.274	94.6979	99.9234	102.225	149.015	105.85	73.5682	176.479	59.0995	103.107	71.9424	115.365	94.3766	193.702	91.5923	86.6102	63.7958	65.0348	114.736	53.0679	112.866	113.326	215.829	85.0555	100.163	127.926	70.611	64.1811	76.3687	107.214	99.3153	70.2946	84.402	73.0238	81.329	90.68	59.7429	97.2193	45.5294	81.403
Foretinib_2040	1.55556	3.81719	3.17543	1.64297	2.61983	3.44859	2.0801	2.3486	1.7219	3.0084	2.56589	2.14169	3.10525	4.14363	3.23266	1.67952	5.12492	1.87871	3.43304	1.57751	3.09442	3.14154	5.1792	2.05104	2.68234	2.02685	1.25729	4.73217	1.89707	3.16866	2.3384	6.6184	2.02517	2.53049	4.76569	2.81687	1.75329	2.86856	4.46794	3.34984	2.82313	2.98958	3.43824	3.5067	2.54967	2.16192	2.70394	2.85727	2.39018
BIBR-1532_2043	115.172	251.992	179.14	147.316	170.061	208.908	138.033	178.568	93.6094	192.917	168.803	143.937	199.825	175.332	173.949	101.605	179.181	109.053	262.914	106.233	177.136	133.918	172.935	156.56	123.751	146.78	91.0434	308.559	157.494	202.693	135.195	177.057	118.807	174.304	302.18	143.671	140.565	185.735	232.163	205.38	157.701	147.807	234.551	198.978	125.569	119.667	178.945	130.603	174.483
Pyridostatin_2044	23.9901	72.212	43.9585	36.5336	42.1693	56.4495	45.0508	69.0094	33.4864	35.0542	50.3649	34.8601	37.6364	42.6473	38.106	24.091	37.0506	29.933	60.8224	26.6264	37.6907	28.2473	43.567	39.4293	23.7413	31.2931	21.8494	71.4049	31.803	36.6164	31.686	46.3993	24.7775	42.8878	70.6368	25.9427	26.4869	44.1926	55.386	30.6599	43.0886	37.4061	50.8436	44.7397	25.495	34.1583	40.1213	40.6138	33.9517
AMG-319_2045	83.2329	247.164	113.411	146.589	158.558	152.064	106.368	203.758	45.2676	175.707	111.266	81.4195	134.082	196.161	216.851	101.819	203.423	94.4329	139.567	69.7056	163.251	150.894	226.932	108.681	94.8068	93.7644	87.4426	178.868	71.5669	183.975	116.804	216.217	146.496	124.464	215.286	67.3163	77.8565	119.171	145.209	112.924	80.8559	71.3292	110.285	86.2421	125.805	143.675	81.9523	62.0368	112.062
MK-8776_2046	12.8061	49.6208	14.8697	39.539	30.1373	19.7538	17.4776	59.5634	5.72354	27.6108	12.6921	8.2868	29.1332	31.4185	38.632	19.2587	30.5182	16.0568	36.3151	17.769	28.1288	31.9706	33.7298	23.6608	10.3483	11.1557	11.62	37.8776	7.04131	30.9743	24.6451	33.5382	23.7439	22.2136	81.8701	13.1889	8.261	24.6767	36.0959	26.7011	13.9852	13.9109	19.0929	25.4891	36.0879	23.9969	20.9516	8.1443	14.7924
Ulixertinib_2047	7.64744	13.3747	14.5703	9.80122	12.9742	15.7496	8.10617	11.1273	9.83735	11.9194	12.0343	14.9258	12.5243	12.6907	10.4384	6.52759	12.2437	8.1139	20.1004	8.72438	12.1137	8.42783	11.4686	12.6066	11.6651	9.47175	6.97022	15.0824	10.3492	14.8661	11.4326	14.645	7.87898	9.35074	11.8109	8.2594	9.28903	13.6289	13.6139	14.5801	12.2981	13.901	16.2861	17.245	9.47772	7.01515	14.234	12.8945	8.4255
Vinorelbine_2048	0.0189117	0.392153	0.135703	0.0440973	0.131289	0.0966412	0.0616814	0.0750636	0.0203821	0.0383707	0.0576744	0.0524011	0.0797512	0.246939	0.0656437	0.0344723	0.483069	0.0328923	0.0688141	0.0272102	0.0961574	0.0981758	0.380599	0.0745915	0.0595033	0.0198783	0.0197988	0.120809	0.0186005	0.106951	0.0675236	0.645092	0.0305722	0.0342771	0.217523	0.0271575	0.0181129	0.0473618	0.0926403	0.0695004	0.043017	0.0508505	0.0746901	0.10228	0.0617125	0.0106071	0.0673221	0.028204	0.0280308
VX-11e_2096	8.90572	19.7683	20.0198	17.1045	20.0139	16.7717	9.51384	11.788	9.16529	14.2333	14.7472	11.9439	17.3842	31.2002	13.2705	12.1053	38.235	13.017	24.7321	14.8953	21.9199	25.9564	30.3279	16.22	21.0499	10.6572	10.3902	20.5904	7.58736	23.3654	18.9968	52.9428	13.3157	14.3328	25.6403	13.2504	8.35417	10.2307	14.5576	18.7743	16.1078	18.9945	16.0426	25.2197	26.2078	7.94516	16.0372	19.6021	5.33077
Uprosertib_2106	8.07909	41.3486	42.8512	28.9918	23.1013	30.7016	18.4188	24.6948	11.5248	17.6412	17.079	9.91868	23.4533	37.3634	24.5731	11.9153	37.0822	14.1839	24.2572	12.5786	20.3201	30.5269	40.1242	17.8586	19.1668	13.141	10.6381	43.3851	12.3965	21.1723	19.2436	58.2575	11.9477	28.5655	39.6384	9.06381	10.3242	32.5349	22.8812	23.81	15.8848	13.0347	12.9839	29.2626	13.3668	14.2336	16.2794	18.9445	9.98549
LJI308_2107	118.958	266.187	143.072	229.02	165.93	164.486	136.692	237.53	87.9954	146.134	118.625	141.392	140.62	187.595	149.55	147.933	178.763	142.045	179.991	115.904	173.146	186.76	191.298	169.627	114.848	213.141	128.085	240.1	127.767	187.556	130.509	182.985	172.828	170.353	302.214	120.504	136.614	194.4	177.377	200.373	189.87	105.403	177.636	120.404	188.799	158.539	118.331	99.4684	140.747
AZ6102_2109	10.4899	16.9691	14.1262	15.9422	14.7003	13.6424	11.6376	17.1665	7.58904	14.3009	10.5103	10.6245	11.4334	15.9671	15.2538	12.5903	19.0215	12.2174	13.5416	11.5264	14.9988	15.9988	20.8598	11.9734	10.4725	9.95813	10.5892	14.4041	8.66308	11.9195	10.1226	22.1499	11.5041	9.87891	20.1384	9.70778	8.31507	9.53731	13.891	13.8049	10.8616	9.79428	12.8992	10.6895	12.4404	11.2069	11.6245	8.3687	9.55872
GSK591_2110	61.9162	242.607	150.143	115.795	149.649	132.189	126.723	120.836	60.0323	100.736	96.235	84.8724	147.197	206.759	108.878	93.5297	218.219	87.9196	126.764	70.9204	158.083	152.998	192.191	106.132	117.985	97.2287	72.8995	204.807	60.8259	136.052	98.3699	257.131	98.5462	112.186	178.265	60.8685	80.9991	94.6785	111.58	116.772	93.0904	99.5225	114.021	107.808	139.684	58.2819	104.419	65.8257	73.7738
VE821_2111	29.0386	166.483	63.6787	86.0639	90.1201	58.687	40.8107	145.555	15.1796	48.8156	38.7936	28.728	77.2024	124.247	88.6265	47.1082	131.923	30.1379	97.6376	40.3121	88.6159	82.373	126.032	59.6361	47.4777	38.204	29.9056	87.9092	30.0878	86.1072	58.3267	181.977	50.5923	71.3606	153.801	24.2331	30.5928	44.296	64.6717	70.924	58.1648	40.2227	57.6905	51.9992	82.334	37.1629	56.3007	26.8013	34.6561
AZD6482_2169	18.8686	28.7344	19.6657	34.9551	22.6077	16.939	21.3162	25.1846	12.7051	16.9578	13.256	20.804	19.5163	28.41	22.2968	26.0281	26.5302	22.3265	22.5041	22.0397	23.4079	36.7537	26.7252	21.6655	18.5967	21.2439	22.4599	20.9747	16.4751	23.1391	18.4146	28.0914	26.3115	20.4762	29.7783	16.0131	15.9214	18.9891	18.1703	22.8467	22.7264	14.3958	17.3299	15.4122	30.5197	23.5085	16.6794	15.2841	14.8669
AT13148_2170	25.9379	170.606	92.226	42.7368	71.9891	73.3281	61.6016	91.9996	25.2497	42.9996	31.2024	20.9242	68.8747	197.09	45.959	36.8216	194.523	38.6592	42.2868	23.1068	77.41	104.841	190.643	59.5732	58.504	28.4105	18.7462	175.639	17.1022	49.5617	33.6002	219.765	28.6282	81.2462	109.622	34.7076	31.7682	40.0259	50.3675	61.8248	33.9512	33.9811	40.1016	60.9846	45.9189	24.0811	63.3272	26.8568	20.1518
BMS-754807_2171	0.67781	0.484007	0.143183	1.18825	0.302086	0.241621	0.542172	1.10329	0.176998	0.540811	0.219081	0.626402	0.3619	0.390405	0.495078	0.744705	0.280946	0.909056	1.89566	0.618662	0.53652	0.731988	0.389197	1.01122	0.25583	1.4337	0.998031	0.414743	0.844859	0.545468	0.370425	0.297248	0.597558	0.874628	1.42426	0.979016	0.97775	0.913393	0.67185	1.58741	2.06055	0.649271	1.26801	0.209263	2.22637	2.3291	0.403894	0.835666	0.600471
JQ1_2172	8.08761	15.0642	2.97101	18.6498	5.97039	4.20737	3.98319	68.9968	1.50933	8.06101	4.25432	7.55032	5.07977	8.496	12.1448	10.4131	9.23483	9.3055	15.5845	6.05446	7.52138	10.1325	11.3936	8.36989	2.07544	11.5325	11.2893	8.44265	7.48465	6.97025	2.77181	9.67575	9.28177	5.46177	39.1121	3.06933	3.58742	6.44933	5.96903	8.25328	12.9388	2.89635	11.2029	2.40637	9.6791	55.3232	6.07463	5.37475	7.61727
[truncated: 403 more columns]
